# Supplementary material for: Construction of p-nitropyrazole-1,3,4-triazole framework energetic compounds: towards a series of high-performance heat-resistant explosives
Source: Royal Society of Chemistry journal article supplement (doi:10.1039/d3ta01811c), 2023-01-01
Supplement: d3ta01811c1.pdf [file d3ta01811c1.pdf]

## *Journal of Materials Chemistry A*

### Supporting Information (SI)

#### **Construction of *p*-nitropyrazole-1,3,4-triazole framework energetic compounds: towards a series of high-performance heat-resistant explosives**

Chengchuang Li<sup>a1</sup>, Teng Zhu<sup>a1</sup>, Caijin Lei<sup>a</sup>, Guangbin Cheng<sup>\*a</sup>, Chuan Xiao<sup>\*b</sup> and Hongwei Yang<sup>\*a</sup>

a. School of Chemistry and Chemical Engineering, Nanjing University of Science and

Technology, Xiaolingwei 200, Nanjing, Jiangsu, China.

\*Corresponding author E-mail: [hyang@mail.njust.edu.cn](mailto:hyang@mail.njust.edu.cn) (H. Yang), [gcheng@mail.njust.edu.cn](mailto:gcheng@mail.njust.edu.cn)

(G. Cheng).

b. China Northern Industries Group Co., Ltd. (NORINCO GROUP), Beijing 100089, P. R. China

\*Corresponding author E-mail: [47785121@qq.com](mailto:47785121@qq.com) (C. Xiao).

## Table of Contents

|                                        |           |
|----------------------------------------|-----------|
| <b>1. Experimental sections.....</b>   | <b>1</b>  |
| <b>2. Computational details .....</b>  | <b>5</b>  |
| <b>3. Crystallographic data.....</b>   | <b>7</b>  |
| <b>4. Spectrums of compounds.....</b>  | <b>11</b> |
| <b>5. DSC and TG of compounds.....</b> | <b>25</b> |

## 1. Experimental sections

### General methods

<sup>1</sup>H and <sup>13</sup>C NMR spectra were recorded on 500 MHz (Bruker AVANCE 500) nuclear magnetic resonance spectrometers operating at 500 and 126 MHz, respectively, by using DMSO-d<sub>6</sub> as the solvent and locking solvent unless otherwise stated. Chemical shifts in <sup>1</sup>H and <sup>13</sup>C NMR spectra are reported relative to DMSO. DSC was performed in closed Al containers with a nitrogen flow of 30 mL min<sup>-1</sup> on an STD-Q600 instrument. Infrared (IR) spectra were recorded on a Perkin-Elmer Spectrum BX FT-IR equipped with an ATR unit at 25 °C. Impact sensitivity and friction sensitivity of samples are measured by using the standard BAM methods.

### Synthesis

#### 5-(3-(1H-pyrazol-4-yl)-1H-1,2,4-triazol-1-yl)-1H-tetrazole (**A3**)

To a mixture of ethyl 1H-pyrazole-4-carbimidate (**1**) (1.39 g, 10 mmol) and ethanol (15 mL), 5-hydrazineyl-1H-tetrazole (**A1**) (1 g, 10 mmol) and TEA (2.02 g, 20 mmol) were added in sequence at ambient temperature. Heat the mixed solution to 35 °C and stirred continuously for 3 h. The solid was dispersed in 15 mL formic acid and heat to reflux for 12 h. After the solution temperature was restored to room temperature, the solution was filtered to obtain solid **A3** (1.69 g, 83 %). <sup>1</sup>H NMR (500 MHz, DMSO-d<sub>6</sub>): δ = 6.24 (br), 8.17 (s), 9.34 (s) ppm. <sup>13</sup>C NMR (126 MHz, DMSO-d<sub>6</sub>): δ = 112.28, 133.24, 145.89, 155.49, 159.34 ppm. IR (KBr):  $\tilde{\nu}$  3436.2, 1603.4, 1573.4, 1531.4, 1486.5, 1433.9, 1208.5, 1085.6, 1002.8, 696.3 cm<sup>-1</sup>. Elemental analysis for C<sub>6</sub>H<sub>5</sub>N<sub>9</sub> (203.17): calcd C, 35.47; H, 2.48; N, 62.05%. Found: C 33.44, H 2.50, N 64.06%.

#### 3-(3,5-dinitro-1H-pyrazol-4-yl)-1H-1,2,4-triazole (**DPT**)

**A3** (1.27 g, 6.60 mmol) was added to the mixture of 98 % sulfuric acid (24 mL) and 98 % nitric acid (4 mL) at 0 °C. The mixture was warmed up to room temperature slowly. The final reaction was stirred at 30 °C for 2 h. After pouring into ice-water under vigorous stirring, the final mixture was filtered, washed with ice-water and dried in air, giving **DPT** as a white solid (1.16 g, 78 %). <sup>1</sup>H NMR (500 MHz, DMSO-d<sub>6</sub>): δ = 6.15 (s), 9.01 (s) ppm. <sup>13</sup>C NMR (126 MHz, DMSO-d<sub>6</sub>): δ = 100.01, 145.63, 147.29, 152.44 ppm. IR (KBr):  $\tilde{\nu}$  3417.2, 2633.4, 1659.1, 1599.9, 1593.5, 1333.7, 1014.9, 868, 820.7 cm<sup>-1</sup>. Elemental analysis for C<sub>5</sub>H<sub>3</sub>N<sub>7</sub>O<sub>4</sub> (225.12): calcd C, 26.68; H, 1.34; N, 43.55%. Found: C 26.67, H 1.36, N 43.53%.

#### 4-(3-(1H-pyrazol-4-yl)-1H-1,2,4-triazol-5-yl)-1,2,5-oxadiazol-3-amine (**B2**)

To a solution of **1** (0.69 g, 5 mmol) in 30 mL absolute methanol, 4-amino-1,2,5-oxadiazole-3-carbohydrazide (**B1**) (0.72 g, 5 mmol) and TEA (1.01 g, 10 mmol) were added in portions. The resulted mixture was refluxed for 12 h. The precipitate was collected through filtration. Dissolve the sediment in 50 mL water, slowly add 0.5 g KOH, and reflux the reaction system for 12h. After cooled to room temperature, concentrated hydrochloric acid was added dropwise to adjust the pH value to 1. The precipitate was collected through filtration, washed with water and dried at 40 °C. <sup>1</sup>H NMR (500 MHz, DMSO-d<sub>6</sub>): δ = 6.53 (s), 8.30 (s) ppm. <sup>13</sup>C NMR (126 MHz, DMSO-d<sub>6</sub>): δ = 108.91, 133.40, 143.11, 148.03, 151.89, 159.38 ppm. IR (KBr):  $\tilde{\nu}$  3415.1, 1664.8, 1617.4, 1595.3, 1471.6, 1392.6, 1230.3, 1068.4, 1031.4, 978.8, 915.6 cm<sup>-1</sup>. Elemental analysis for C<sub>7</sub>H<sub>6</sub>N<sub>8</sub>O (218.18): calcd C, 38.54; H, 2.77; N, 51.36%. Found: C 38.56, H 2.75, N 51.37%.

#### 3-(3-(1H-pyrazol-4-yl)-1H-1,2,4-triazol-5-yl)-4-nitro-1,2,5-oxadiazole (**B3**)

10 mL hydrogen peroxide (H<sub>2</sub>O<sub>2</sub>, 30%) was added 20 mL sulfuric acid (H<sub>2</sub>SO<sub>4</sub>, 98%) at 0 °C. Then **B2** (1.30 g, 6 mmol) was slowly added. The resulted solution was maintained at room temperature for 12 h. Then the acidic solution was quenched with the ice. The formed solid was filtrated to give the white powder **B3** (1.01 g, 68 %). <sup>1</sup>H NMR (500 MHz, DMSO-d<sub>6</sub>): δ = 8.23 (s) ppm. <sup>13</sup>C NMR (126 MHz, DMSO-d<sub>6</sub>): δ = 109.24, 137.35, 139.59, 151.45, 155.83, 159.76 ppm. IR (KBr):  $\tilde{\nu}$  3445.3, 1726.4, 1614.3, 1598.7, 1448.0, 1391.6, 1340.8, 1237.5, 1146.2, 1060.6, 980.5, 864.4 cm<sup>-1</sup>. Elemental analysis for C<sub>7</sub>H<sub>4</sub>N<sub>8</sub>O<sub>3</sub> (248.16): calcd C, 33.88; H, 1.62; N, 45.15%. Found: C 33.87, H 1.64, N 45.14%.

#### 3-nitro-4-(3-(3-nitro-1H-pyrazol-4-yl)-1H-1,2,4-triazol-5-yl)-1,2,5-oxadiazole (**B4**)

15 mL concentrated H<sub>2</sub>SO<sub>4</sub> (98%) was cooled to 0 °C, then compound **B3** (1.48 g, 6 mmol) was added slowly. After complete dissolution, 5 mL fuming HNO<sub>3</sub> was added dropwise. The resulted mixture was heated at 100 °C for 12 h. Finally, the acidic mixture was quenched with crushed ice and the precipitate was filtrated to obtained the final product as white powder. **B4** (1.71 g, 97 %). <sup>1</sup>H NMR (500 MHz, DMSO-d<sub>6</sub>): δ = 8.21 (s) ppm. <sup>13</sup>C NMR (126 MHz, DMSO-d<sub>6</sub>): δ = 97.78, 125.20, 144.71, 148.11, 148.66, 149.71, 155.38 ppm. IR (KBr):  $\tilde{\nu}$  3462.6, 1662.8, 1456.2, 1348.1, 1285.5, 1263.7, 1254.8, 1194.7, 1084.2, 1077.4, 1069.2, 734.2, 525.2 cm<sup>-1</sup>. Elemental analysis for C<sub>7</sub>H<sub>3</sub>N<sub>9</sub>O<sub>5</sub> (293.16): calcd C, 28.68; H, 1.03; N, 43.00%. Found: C 28.70, H 1.01, N 43.01%.

#### 3-(3-(3,5-dinitro-1H-pyrazol-4-yl)-1H-1,2,4-triazol-5-yl)-4-nitro-1,2,5-oxadiazole

### (DPTO)

15 mL concentrated fuming H<sub>2</sub>SO<sub>4</sub> (20%) was cooled to 0 °C, then compound **B3** (1.48 g, 6 mmol) was added slowly. After complete dissolution, 5 mL fuming HNO<sub>3</sub> was added dropwise. The resulted mixture was heated at 120 °C for 12 h. Finally, the acidic mixture was quenched with crushed ice and the precipitate was filtrated to obtained the final product as white powder. **DPTO** (1.91 g, 94 %). <sup>13</sup>C NMR (126 MHz, DMSO-d<sub>6</sub>): δ = 100.14, 143.01, 147.25, 148.08, 152.19, 159.52 ppm. IR (KBr):  $\tilde{\nu}$  3436.9, 3380.5, 1727.7, 1692.9, 1678.0, 1375.6, 1338.8, 1336.1, 1067.8, 813.4, 796.8, 696.1 cm<sup>-1</sup>. Elemental analysis for C<sub>7</sub>H<sub>2</sub>N<sub>10</sub>O<sub>7</sub> (338.16): calcd C, 24.86; H, 0.60; N, 41.42%. Found: C 24.86, H 0.62, N 41.39%.

### 5-(4,5-dinitro-1H-pyrazol-3-yl)-3-(1H-pyrazol-4-yl)-1H-1,2,4-triazole (**C2**)

The synthetic procedure for **C2** was similar to that of **B2**, only 4,5-dinitro-1H-pyrazole-3-carbohydrazide (**C1**) (0.54 g, 2.5 mmol) was used instead of **B1**. **C2** (0.54 g, 79 %). <sup>1</sup>H NMR (500 MHz, DMSO-d<sub>6</sub>): δ = 8.18 (s) ppm. <sup>13</sup>C NMR (126 MHz, DMSO-d<sub>6</sub>): δ = 114.35, 136.16, 138.48, 144.79, 148.51, 156.23, 157.62 ppm. IR (KBr):  $\tilde{\nu}$  3394.1, 1724.8, 1680.6, 1605.1, 1343.1, 1335.8, 1329.5, 1315.4, 1252.9, 1236.7, 817.7, 778, 730.6 cm<sup>-1</sup>. Elemental analysis for C<sub>8</sub>H<sub>5</sub>N<sub>9</sub>O<sub>4</sub> (291.19): calcd C, 33.00; H, 1.73; N, 43.29%. Found: C 33.01, H 1.71, N 43.31%.

### 5-(4,5-dinitro-1H-pyrazol-3-yl)-3-(3,5-dinitro-1H-pyrazol-4-yl)-1H-1,2,4-triazole (**DPPT**)

The synthetic procedure for **DPPT** was similar to that of **B4**, only **C2** (0.72 g, 2.5 mmol) was used instead of **B3**. **DPPT** (0.36 g, 38 %). <sup>13</sup>C NMR (126 MHz, DMSO-d<sub>6</sub>): δ = 104.48, 138.46, 140.10, 144.19, 148.69, 157.34, 162.80 ppm. IR (KBr):  $\tilde{\nu}$  3389.3, 3381.3, 1728.8, 1690.9, 1688.0, 1681.0, 1341.5, 1336.0, 1314.5, 817.5, 813.3 cm<sup>-1</sup>. Elemental analysis for C<sub>8</sub>H<sub>3</sub>N<sub>11</sub>O<sub>8</sub> (381.18): calcd C, 25.21; H, 0.79; N, 40.42%. Found: C 25.22, H 0.77, N 40.44%.

### 5'-(1H-pyrazol-4-yl)-1H,2'H-[3,3'-bi(1,2,4-triazol)]-5-amine (**D2**)

The synthetic procedure for **D2** was similar to that of **B2**, only 4,5-dinitro-1H-pyrazole-3-carbohydrazide (**D1**) (0.35 g, 2.5 mmol) was used instead of **B1**. **D2** (0.46 g, 85 %). <sup>1</sup>H NMR (500 MHz, DMSO-d<sub>6</sub>): δ = 5.15 (br), 8.22 (s) ppm. <sup>13</sup>C NMR (126 M, DMSO-d<sub>6</sub>): δ = 110.20, 133.24, 147.01, 151.54, 156.96, 161.08 ppm. IR (KBr):  $\tilde{\nu}$  1627.6, 1607.6, 1422.4, 1402.2, 1383.5, 1318.2, 1201.1, 1135.4, 1035.2, 725.6, 632.4, 608.3, 579.8 cm<sup>-1</sup>. Elemental analysis for C<sub>7</sub>H<sub>7</sub>N<sub>9</sub> (217.20): calcd C, 38.71; H, 3.25; N,

58.04%. Found: C 38.72, H 3.23, N 58.05%.

5-nitro-5'-(1H-pyrazol-4-yl)-1H,2'H-3,3'-bi(1,2,4-triazole) (**D3**)

**D2** (2.17 g, 10 mmol) in 20% sulfuric acid (6 ml) was added dropwise to a solution of sodium nitrite (6.8 g, 98 mmol) in water (10 ml) at 40°C. The resulted solution was maintained at 50 °C for 12 h. Then the acidic solution was quenched with the ice. The formed solid was filtrated to give the white powder **D3** (1.63 g, 68%). <sup>1</sup>H NMR (500 MHz, DMSO-d<sub>6</sub>): δ = 8.92 (s) ppm. <sup>13</sup>C NMR (126 MHz, DMSO-d<sub>6</sub>): δ = 109.23, 137.24, 139.78, 147.46, 157.20, 159.77 ppm. IR (KBr):  $\tilde{\nu}$  3407.6, 1677.7, 1606.8, 1508.7, 1439.5, 1410.1, 1338.0, 1323.7, 1212.8, 1195.9, 796.9, 733.2, 637.7 cm<sup>-1</sup>. Elemental analysis for C<sub>7</sub>H<sub>5</sub>N<sub>9</sub>O<sub>2</sub> (247.18): calcd C, 34.01; H, 2.04; N, 51.00%. Found: C 34.02, H 2.02, N 51.02%.

(Z)-1,2-bis(5'-(3,5-dinitro-1H-pyrazol-4-yl)-1H,2'H-[3,3'-bi(1,2,4-triazol)]-5-yl)diazene (**D4**)

The synthetic procedure for **D4** was similar to that of **B4**, only **D2** (0.78 g, 0.25 mmol) was used instead of **B3**. **D4** (0.59 g, 39 %). <sup>13</sup>C NMR (126 MHz, DMSO-d<sub>6</sub>): δ = 102.09, 139.70, 155.93, 157.29, 157.66, 159.77 ppm. IR (KBr):  $\tilde{\nu}$  3386.5, 1693.8, 1671.7, 1430.6, 1334.3, 1331.3, 1315.3, 1240.5, 1233.4, 1103.7, 814.3, 731.6, 672.1 cm<sup>-1</sup>. Elemental analysis for C<sub>14</sub>H<sub>6</sub>N<sub>22</sub>O<sub>8</sub> (610.35): calcd C, 27.55; H, 0.99; N, 50.49%. Found: C 27.54, H 1.01, N 50.47%.

5'-(3,5-dinitro-1H-pyrazol-4-yl)-5-nitro-1H,2'H-3,3'-bi(1,2,4-triazole) (**DPBT**)

The synthetic procedure for **DPBT** was similar to that of **B4**, only **D3** (0.62 g, 2.5 mmol) was used instead of **B3**. **DPBT** (0.29 g, 35 %). <sup>13</sup>C NMR (126 MHz, DMSO-d<sub>6</sub>): δ = 102.18, 139.56, 149.46, 157.51, 158.35, 159.74 ppm. IR (KBr):  $\tilde{\nu}$  3401.9, 3383.3, 1692.0, 1684.5, 1676.7, 1438.6, 1337.2, 1326.0, 1316.9, 1222.2, 813.8, 797.2, 733.6 cm<sup>-1</sup>. Elemental analysis for C<sub>7</sub>H<sub>3</sub>N<sub>11</sub>O<sub>6</sub> (337.03): calcd C, 24.94; H, 0.90; N, 45.70%. Found: C 24.95, H 0.88, N 45.71%.

3,3'-(4-nitro-1H-pyrazole-3,5-diyl)bis(5-(1H-pyrazol-4-yl)-1H-1,2,4-triazole) (**E2**)

The synthetic procedure for **E2** was similar to that of **B2**, only 4-nitro-1H-pyrazole-3,5-dicarbohydrazide (**E1**) (0.27 g, 1.2 mmol) was used instead of **B1**. **E2**: (0.35 g, 77 %). <sup>1</sup>H NMR (500 MHz, DMSO-d<sub>6</sub>): δ = 8.04 (s) ppm. <sup>13</sup>C NMR (126 MHz, DMSO-d<sub>6</sub>): δ = 99.99, 117.89, 134.99, 135.52, 136.74, 164.84 ppm. IR (KBr):  $\tilde{\nu}$  3443.4, 1682.8, 1619.8, 1612.8, 1593.4, 1439.6, 1436.3, 1341.0, 1237.5, 1203.8, 1050.5, 667.5, 595.8

cm<sup>-1</sup>. Elemental analysis for C<sub>13</sub>H<sub>9</sub>N<sub>13</sub>O<sub>2</sub> (379.30): calcd C, 41.17; H, 2.39; N, 48.01%. Found: C 41.18, H 2.37, N 48.02%.

3,3'-(4-nitro-1H-pyrazole-3,5-diyl)bis(5-(3,5-dinitro-1H-pyrazol-4-yl)-1H-1,2,4-triazole) (**PBPT**)

The synthetic procedure for **PBPT** was similar to that of **B4**, only **E2** (0.47 g, 0.12 mmol) was used instead of **B3**. **PBPT** (0.24 g, 36 %). <sup>1</sup>H NMR (500 MHz, DMSO-d<sub>6</sub>): δ = 6.44 (br) ppm. <sup>13</sup>C NMR (126 MHz, DMSO-d<sub>6</sub>): δ = 101.53, 130.71, 133.78, 147.31, 150.58, 151.60 ppm. IR (KBr):  $\tilde{\nu}$  3393.4, 3372.5, 3371.8, 1712.5, 1702.0, 11674.1, 1665.2, 1650.2, 1339.3, 1336.4, 1312.2, 1306.3, 815 cm<sup>-1</sup>. Elemental analysis for C<sub>13</sub>H<sub>5</sub>N<sub>17</sub>O<sub>10</sub> (559.29): calcd C, 27.92; H, 0.90; N, 42.58%. Found: C 27.93, H 0.88, N 42.59%.

## 2. Computational details

Computations were performed by using the Gaussian09 suite of programs [1]. The elementary geometric optimization and the frequency analysis were performed at the level of the Becke three parameter, Lee-Yan-Parr (B3LYP) functional with the 6-311+G\*\* basis set [2-4]. All of the optimized structures were characterized to be local energy minima on the potential surface without any imaginary frequencies. Atomization energies were calculated by the CBS-4M [5]. All the optimized structures were characterized to be true local energy minima on the potential-energy surface without imaginary frequencies.

The predictions of heats of formation (HOF) of compounds used the hybrid DFTB3LYP methods with the 6-311+G\*\* basis set through designed isodesmic reactions. The isodesmic reaction processes, that is, the number of each kind of formal bond is conserved, were used with the application of the bond separation reaction (BSR) rules. The molecule was broken down into a set of two heavy-atom molecules containing the same component bonds. The isodesmic reactions used to derive the HOF shown in Scheme S1.

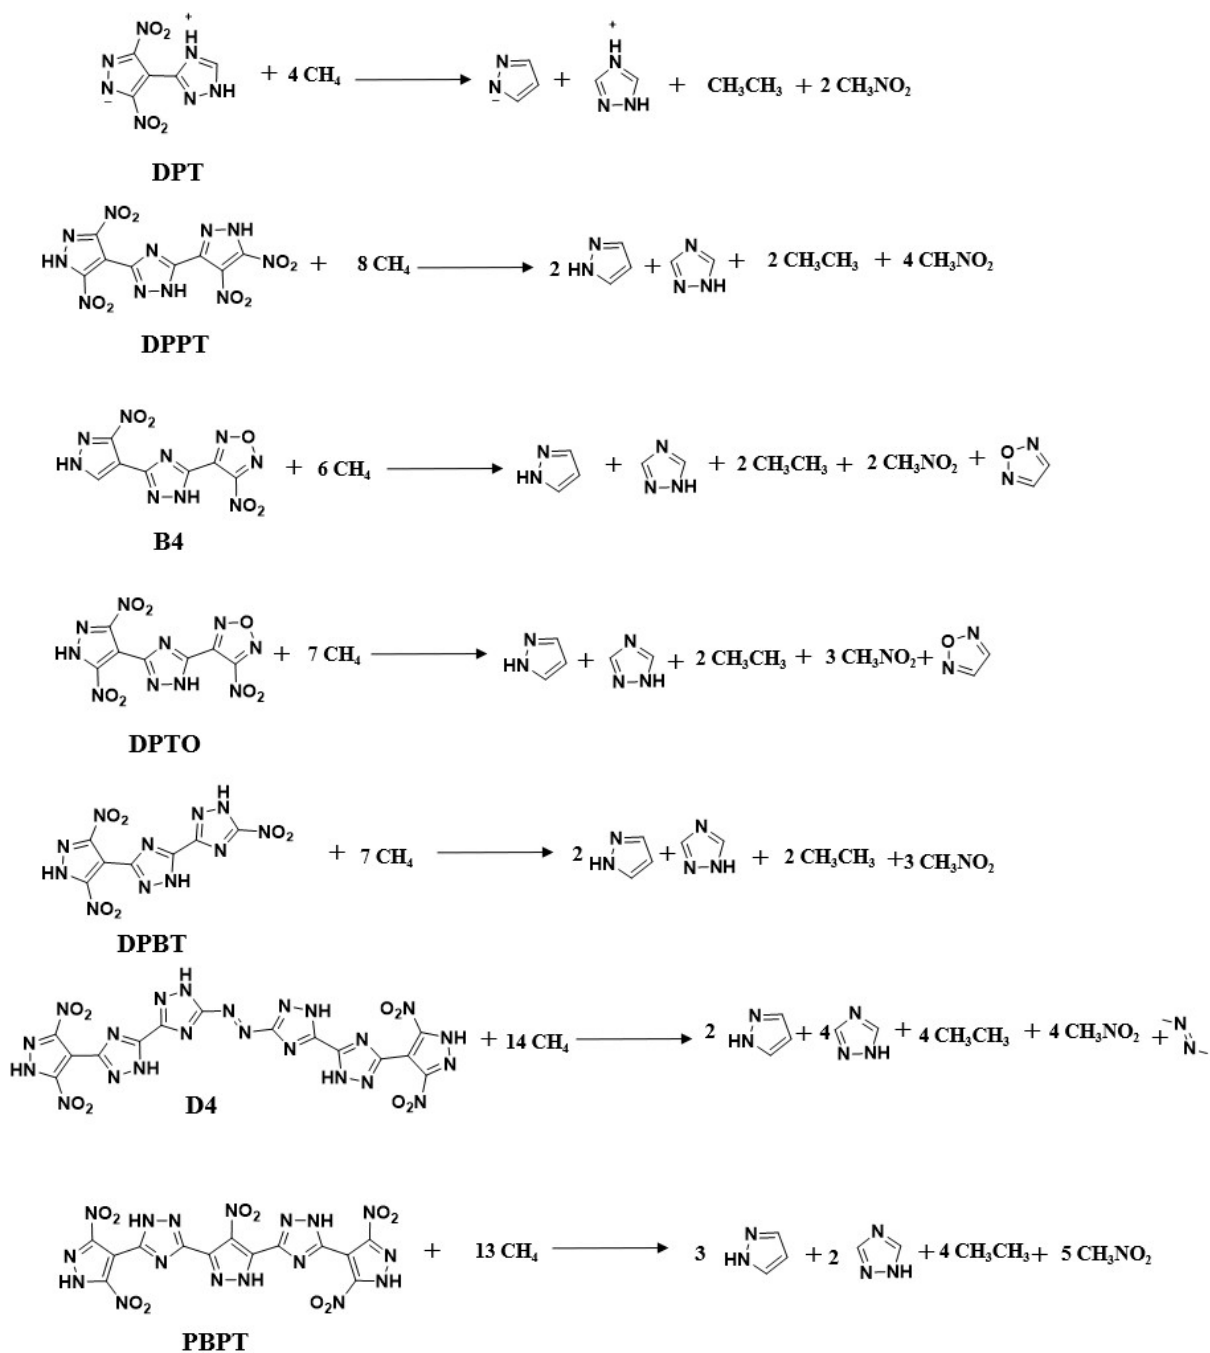

**Scheme S1.** The isodesmic reactions for calculating heat of formation.

The change of enthalpy for the reactions at 298K can be expressed by Equation (1):

$$\Delta H_{298} = \Sigma \Delta_f H_P - \Sigma \Delta_f H_R \quad (1)$$

Where  $\Sigma \Delta_f H_P$  and  $\Sigma \Delta_f H_R$  are the *HOF* of the reactants and products at 298 K, respectively, and  $\Delta H_{298}$  can be calculated from the following expression in Equation (2):

$$\Delta H_{298} = \Delta E_{298} + \Delta(PV) = \Delta E_0 + \Delta ZPE + \Delta H_T + \Delta nRT \quad (2)$$

where  $\Delta E_0$  is the change in total energy between the products and the reactants at 0



K;  $\Delta ZPE$  is the difference between the zero-point energies ( $ZPE$ ) of the products and the reactants at 0 K;  $\Delta H_T$  is the thermal correction from 0 to 298 K. The  $\Delta(PV)$  value in Equation (2) is the  $PV$  work term. It equals  $\Delta nRT$  for the reactions of an ideal gas. For the isodesmic reactions  $\Delta n = 0$ , so  $\Delta(PV) = 0$ . On the left side of Equation (2), apart from target compound all the others are called reference compounds. The HOF of reference compounds are available either from experiments or from the high level computing such as CBS-4M.

**Table S1.** Calculated zero-point energy ( $ZPE$ ), thermal correction to enthalpy ( $HT$ ), total energy ( $E0$ ) and heats of formation ( $HOF$ )

| Compound                                                                            | $E_0 / \text{a. u.}$ | $ZPE / \text{kJ mol}^{-1}$ | $\Delta H_T / \text{kJ mol}^{-1}$ | $HOF / \text{kJ mol}^{-1}$ |
|-------------------------------------------------------------------------------------|----------------------|----------------------------|-----------------------------------|----------------------------|
| <b>DPT</b>                                                                          | -876.463487          | 292.68                     | 36.14                             | 470.14                     |
| <b>B4</b>                                                                           | -1137.369522         | 358.14                     | 46.29                             | 748.38                     |
| <b>DPTO</b>                                                                         | -1341.913565         | 363.40                     | 53.49                             | 788.49                     |
| <b>DPPT</b>                                                                         | -1510.616356         | 434.52                     | 60.49                             | 737.21                     |
| <b>D4</b>                                                                           | -2343.448562         | 760.40                     | 96.68                             | 1626.60                    |
| <b>DPBT</b>                                                                         | -1322.133698         | 399.20                     | 53.22                             | 723.01                     |
| <b>PBPT</b>                                                                         | -2181.352722         | 672.35                     | 88.11                             | 1149.88                    |
| $\text{CH}_4$                                                                       | -40.5339263          | 112.26                     | 22.92                             | -74.60                     |
| $\text{CH}_3\text{NO}_2$                                                            | -245.0915559         | 124.93                     | 11.60                             | -80.80                     |
| $\text{CH}_3\text{CH}_3$                                                            | -79.8565413          | 187.31                     | 11.79                             | -84.00                     |
| Pyrazole anion                                                                      | -225.669742          | 141.88                     | 12.21                             | 163.33                     |
| 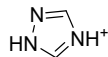 | -242.669331          | 184.02                     | 12.27                             | 831.72                     |
|  | -242.320387          | 150.39                     | 12.06                             | 192.70                     |
|  | -226.260331          | 179.20                     | 12.57                             | 177.40                     |
|  | -262.1183629         | 114.62                     | 11.84                             | 215.70                     |

## Reference

- [1] M. J. Frisch. Gaussian 09, Revision D. 01 (Gaussian Inc., 2009).
- [2] A. D. Becke, J. Chem. Phys. 1993, 98, 5648-5652
- [3] P. J. Stephens; F. J. Devlin; C. F. Chabalowski; M. J. Frisch. J. Phys. Chem. 1994, 98, 11623-11627.
- [4] P. C. Hariharan; J. A. Pople, Theor. Chim. Acta. 1973, 28, 213-222.
- [5] J. W. Ochterski; G. A. Petersson ; J. A . Montgomery, J. Chem. Phys. 1996, 104, 2598-2619.

### 3. Crystallographic data

**Table S2.** Crystallographic data for **DPT**, **DPTO**, **PPBTBT** and **PBPT**.

| Crystal                                  | DPT·H <sub>2</sub> O                                                | DPTO·DMSO                                                              | D4·4DMSO                                                                       | PBPT·6.375H <sub>2</sub> O                                             |
|------------------------------------------|---------------------------------------------------------------------|------------------------------------------------------------------------|--------------------------------------------------------------------------------|------------------------------------------------------------------------|
| CCDC number                              | 2240058                                                             | 2240059                                                                | 2240060                                                                        | 2157697                                                                |
| Empirical Formula                        | C <sub>5</sub> H <sub>3</sub> N <sub>7</sub> O <sub>4</sub>         | C <sub>9</sub> H <sub>8</sub> N <sub>10</sub> O <sub>8</sub> S         | C <sub>22</sub> H <sub>30</sub> N <sub>22</sub> O <sub>12</sub> S <sub>4</sub> | C <sub>26</sub> H <sub>35.5</sub> N <sub>34</sub> O <sub>32.75</sub>   |
| Formula weight                           | 243.16                                                              | 416.31                                                                 | 922.92                                                                         | 1348.38                                                                |
| Temperature [K]                          | 150.0                                                               | 193.0                                                                  | 193.0                                                                          | 193.0                                                                  |
| Crystal system                           | monoclinic                                                          | monoclinic                                                             | monoclinic                                                                     | triclinic                                                              |
| Space group                              | P2 <sub>1</sub> /c                                                  | C2/c                                                                   | P2 <sub>1</sub> /n                                                             | P-1                                                                    |
| <i>a</i> /Å                              | 8.0502(9)                                                           | 14.8387(6)                                                             | 13.3925(10)                                                                    | 12.8475(2)                                                             |
| <i>b</i> /Å                              | 7.1414(11)                                                          | 10.0023(6)                                                             | 9.5809(8)                                                                      | 13.8913(3)                                                             |
| <i>c</i> /Å                              | 16.024(3)                                                           | 22.8813 (11)                                                           | 15.0000 (11)                                                                   | 15.5935(3)                                                             |
| $\alpha$ /°                              | 90                                                                  | 90                                                                     | 90                                                                             | 94.3860 (10)                                                           |
| $\beta$ /°                               | 98.172(8)                                                           | 104.593(5)                                                             | 99.347(8)                                                                      | 104.9360(10)                                                           |
| $\gamma$ /°                              | 90                                                                  | 90                                                                     | 90                                                                             | 99.5510(10)                                                            |
| Cell volume (Å <sup>3</sup> )            | 911.8(2)                                                            | 3286.3(9)                                                              | 1899.1(3)                                                                      | 2630.80(9)                                                             |
| Crystal                                  | DPT·H <sub>2</sub> O                                                | DPTO·DMSO                                                              | D4·4DMSO                                                                       | PBPT·6.375H <sub>2</sub> O                                             |
| Density (g cm <sup>-3</sup> )            | 1.771                                                               | 1.683                                                                  | 1.614                                                                          | 1.702                                                                  |
| $\mu$ (mm <sup>-1</sup> )                | 0.158                                                               | 2.421                                                                  | 0.214                                                                          | 1.384                                                                  |
| F (000)                                  | 496.0                                                               | 1696.0                                                                 | 750.0                                                                          | 1383.0                                                                 |
| Crystal Size (mm <sup>3</sup> )          | 0.11×0.06×0.04                                                      | 0.13×0.12×0.1<br>1                                                     | 0.13×0.12×0.10                                                                 | 0.12×0.1×0.1                                                           |
| 2 $\theta$ range for data collection (°) | 5.136 to 52.798                                                     | 7.986 to<br>136.994                                                    | 2.532 to 27.507                                                                | 5.912 to<br>136.688                                                    |
| Index ranges                             | -10 ≤ <i>h</i> ≤ 8,<br>-8 ≤ <i>k</i> ≤ 8,<br>-20 ≤ <i>l</i> ≤ 19    | -13 ≤ <i>h</i> ≤ 17,<br>-12 ≤ <i>k</i> ≤ 11,<br>-27 ≤ <i>l</i> ≤ 26    | -17 ≤ <i>h</i> ≤ 17,<br>-12 ≤ <i>k</i> ≤ 12,<br>-19 ≤ <i>l</i> ≤ 18            | -14 ≤ <i>h</i> ≤ 15,<br>-16 ≤ <i>k</i> ≤ 16,<br>-18 ≤ <i>l</i> ≤ 18    |
| Reflections collected                    | 8280                                                                | 12557                                                                  | 20190                                                                          | 35906                                                                  |
| Independent reflections                  | 1848<br>[R <sub>int</sub> = 0.0431,<br>R <sub>sigma</sub> = 0.0362] | 3006<br>[R <sub>int</sub> = 0.0501,<br>R <sub>sigma</sub> =<br>0.0367] | 4350<br>[R <sub>int</sub> = 0.0772,<br>R <sub>sigma</sub> = 0.0545]            | 9610<br>[R <sub>int</sub> = 0.0592,<br>R <sub>sigma</sub> =<br>0.0492] |
| Data/restraints/parameters               | 1848/0/161                                                          | 3006/0/263                                                             | 4350/24/254                                                                    | 9610/0/881                                                             |
| Goodness-of-fit on F <sup>2</sup>        | 1.080                                                               | 1.056                                                                  | 1.064                                                                          | 1.024                                                                  |
| Final R indexes [I ≥ 2 $\sigma$ (I)]     | R <sub>1</sub> = 0.0403,                                            | R <sub>1</sub> = 0.0364,                                               | R <sub>1</sub> = 0.0886,                                                       | R <sub>1</sub> = 0.0501,                                               |

|                            |                                    |                                    |                                   |                                    |
|----------------------------|------------------------------------|------------------------------------|-----------------------------------|------------------------------------|
|                            | $wR_2 = 0.0950$                    | $wR_2 = 0.1001$                    | $wR_2 = 0.2532$                   | $wR_2 = 0.1280$                    |
| Final R indexes [all data] | $R_1 = 0.0563,$<br>$wR_2 = 0.1049$ | $R_1 = 0.0400,$<br>$wR_2 = 0.1015$ | $R_1 = 0.1373$<br>$wR_2 = 0.2953$ | $R_1 = 0.0609,$<br>$wR_2 = 0.1354$ |

**Table S3.** Bond angles for DPT.

| Atom | Atom | Atom | Angle/°  | Atom | Atom | Atom | Angle/°  |
|------|------|------|----------|------|------|------|----------|
| H5A  | -O5  | -H5B | 109.00   | N3   | -C1  | -C2  | 106.3(3) |
| N2   | -N1  | -C3  | 107.8(1) | N2   | -C1  | -N3  | 122.3(3) |
| N1   | -N2  | -C1  | 106.6(1) | N2   | -C1  | -C2  | 131.1(2) |
| O3   | -N3  | -C1  | 117.4(2) | C3   | -C2  | -C4  | 106.5(2) |
| O4   | -N3  | -C1  | 118.7(2) | C1   | -C2  | -C3  | 133.3(2) |
| O3   | -N3  | -C4  | 123.8(2) | C1   | -C2  | -C4  | 109.4(2) |
| O1   | -N4  | -C3  | 118.1(1) | N1   | -C3  | -N4  | 117.2(3) |
| O2   | -N4  | -C3  | 128.9(2) | N1   | -C3  | -C2  | 116.1(2) |
| O1   | -N4  | -O2  | 124.9(2) | N4   | -C3  | -C2  | 120.6(2) |
| N6   | -N5  | -C5  | 123.7(2) | N5   | -C4  | -C2  | 123.3(3) |
| N5   | -N6  | -C5  | 111.2(2) | N7   | -C4  | -C2  | 109.9(3) |
| C4   | -N7  | -H6  | 106.4(2) | N5   | -C4  | -N7  | 122.2(2) |
| C5   | -N6  | -H6  | 128.2(2) | N6   | -C5  | -N7  | 127.9(3) |
| N5   | -N6  | -H7  | 120.3(2) | N6   | -C5  | -H5  | 109.5(2) |
| C5   | -N7  | -H7  | 127.00   | N7   | -C5  | -H5  | 119.5(3) |

**Table S4.** Hydrogen bonds for DPT.

| D-H...A     | d(D-H)/ Å | d(H...A)/ Å | d(D...A)/ Å | <(DHA)/ ° |
|-------------|-----------|-------------|-------------|-----------|
| O5-H5A...O3 | 0.8700    | 2.0800      | 2.941(2)    | 173.00    |
| O5-H5B...N2 | 0.8700    | 2.0900      | 2.954(2)    | 172.00    |
| N6-H6...O1  | 1.08(3)   | 2.45(3)     | 3.063(2)    | 115.2(17) |
| N6-H6...N1  | 1.08(3)   | 1.65(3)     | 2.706(2)    | 165(2)    |
| N7-H7...O5  | 0.8800    | 1.8500      | 2.688(2)    | 159.00    |
| C5-H5...O1  | 0.9500    | 2.5000      | 3.409(2)    | 159.00    |

| D-H...A    | d(D-H)/ Å | d(H...A)/ Å | d(D...A)/ Å | <(DHA)/ ° |
|------------|-----------|-------------|-------------|-----------|
| C5-H5...O2 | 0.9500    | 2.5000      | 3.149(2)    | 125.00    |

**Table S5.** Torsion angles for **DPTO**.

| Parameter   | Bond angles (Å) | Parameter    | Bond angles (Å) |
|-------------|-----------------|--------------|-----------------|
| N3-O1-N2-C1 | 1.00(19)        | C4-C5-C6-N7  | -2.9(3)         |
| N2-O1-N3-C2 | -1.05(18)       | C4-C5-C6-N8  | 176.8(16)       |
| O2-N1-C1-N2 | 47.0(3)         | C7-C5-C6-N7  | -179.4(17)      |
| O2-N1-C1-C2 | -134.6(3)       | C7-C5-C6-N8  | 0.29(19)        |
| O3-N1-C1-N2 | -131.2(2)       | C4-C5-C7-N9  | -177.4(17)      |
| O3-N1-C1-C2 | 47.1(3)         | C4-C5-C7-N10 | -1.7(3)         |
| N6-C4-C5-C6 | 120.1(2)        | C6-C5-C7-N9  | -1.15(18)       |
| N6-C4-C5-C7 | -64.4(3)        | C6-C5-C7-N10 | 174.6(17)       |

**Table S6.** Torsion angles for **D4**.

| Parameter     | Bond angles (Å) | Parameter        | Bond angles (Å) |
|---------------|-----------------|------------------|-----------------|
| O1-N4-C11-C12 | -176.0(7)       | N2-N3-C11-N4     | -179.6(4)       |
| O1-N4-C11-N3  | 3.6(7)          | N2-N3-C11-C12    | 0.0(5)          |
| O2-N4-C11-N3  | -177.5(4)       | C15-N7-C8-N10    | -1.0 (4)        |
| O2-N4-C11-C12 | 3.0(7)          | C15- N7-C8-C14   | 175.2(4)        |
| O5-N1-C10-N2  | -173.5(4)       | C8- N7-C15-N11   | 0.9(4)          |
| O5-N1-C10-C12 | 7.0(7)          | C8- N7-C15-N1012 | -177.7(4)       |
| N3-N2-C10-N1  | 177.2(4)        | C14- N9-C13-N6   | -0.7(4)         |
| N3-N2-C10-C12 | -0.8(5)         | C14- N9-C13-C12  | 175.6(4)        |

**Table S7.** Torsion angles for **PBPT**.

| Parameter   | Bond angles (Å) | Parameter   | Bond angles (Å) |
|-------------|-----------------|-------------|-----------------|
| N2-N1-C3-N3 | 176.4(19)       | O3-N4-C1-N2 | 23.6(3)         |
| N2-N1-C3-C2 | 0.2(3)          | O3-N4-C1-C2 | -159.2(2)       |
| N1-N2-C1-N4 | 177.1(19)       | O4-N4-C1-N2 | -156.2(2)       |

|             |           |             |            |
|-------------|-----------|-------------|------------|
| N1-N2-C1-C2 | -0.5(3)   | O4-N4-C1-C2 | 21.1(2)    |
| O1-N3-C3-N1 | 8.9(3)    | C5-N7-C4-N5 | 0.5(3)     |
| O1-N3-C3-C2 | -175.8(2) | C5-N7-C4-C2 | -177.9(2)  |
| O2-N3-C3-N1 | -170.4(2) | C4-N7-C5-N6 | -0.4(2)    |
| O2-N3-C3-C2 | 5.0(4)    | C4-N7-C5-C6 | -179.2 (2) |

**Table S8.** Hydrogen bonds for PBPT.

| D-H $\cdots$ A       | d(D-H)/ Å | d(H $\cdots$ A)/ Å | d(D $\cdots$ A)/ Å | $\angle$ (DHA)/ ° |
|----------------------|-----------|--------------------|--------------------|-------------------|
| N1-H1 $\cdots$ O31   | 0.8800    | 1.7600             | 2.640(3)           | 173.00            |
| N6-H6 $\cdots$ O5    | 0.8800    | 2.1600             | 2.783(3)           | 128.00            |
| N6-H6 $\cdots$ O28   | 0.8800    | 2.1100             | 2.849(3)           | 141.00            |
| N9-H9 $\cdots$ O27   | 0.8800    | 1.8100             | 2.654(3)           | 161.00            |
| N13-H13 $\cdots$ O24 | 0.8800    | 1.9100             | 2.762(3)           | 162.00            |
| N15-H15 $\cdots$ O26 | 0.8800    | 1.7000             | 2.526(3)           | 156.00            |

#### 4. Spectrums of compounds.

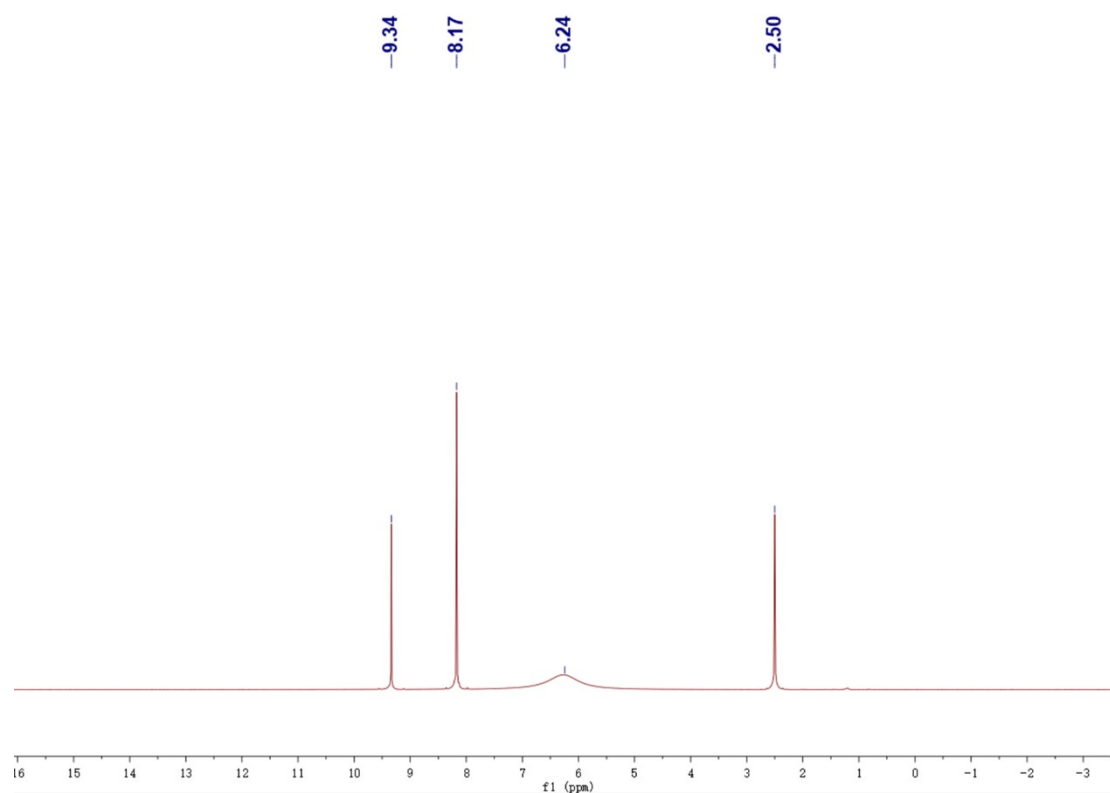

**Figure S1.**  $^1\text{H}$  NMR spectra in DMSO-d6 for **A3**.

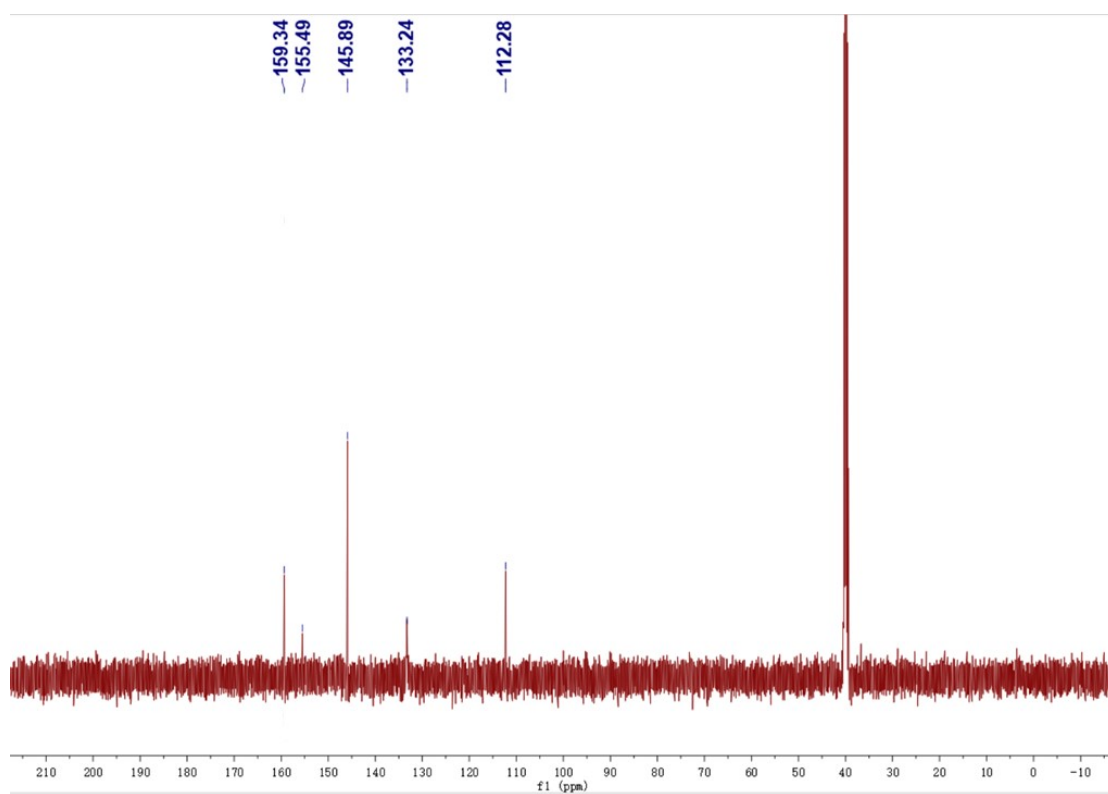

**Figure S2.**  $^{13}\text{C}$  NMR spectra in DMSO-d6 for **A3**.

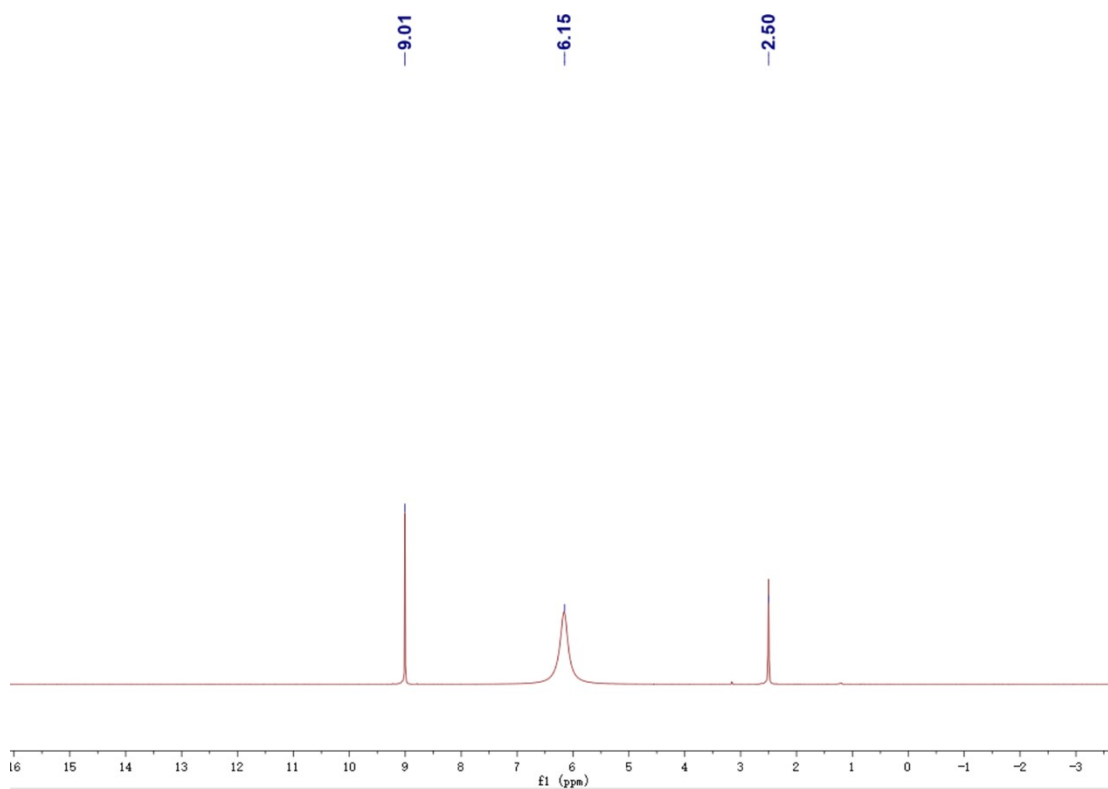

**Figure S3.**  $^1\text{H}$  NMR spectra in DMSO-d6 for **DPT**.

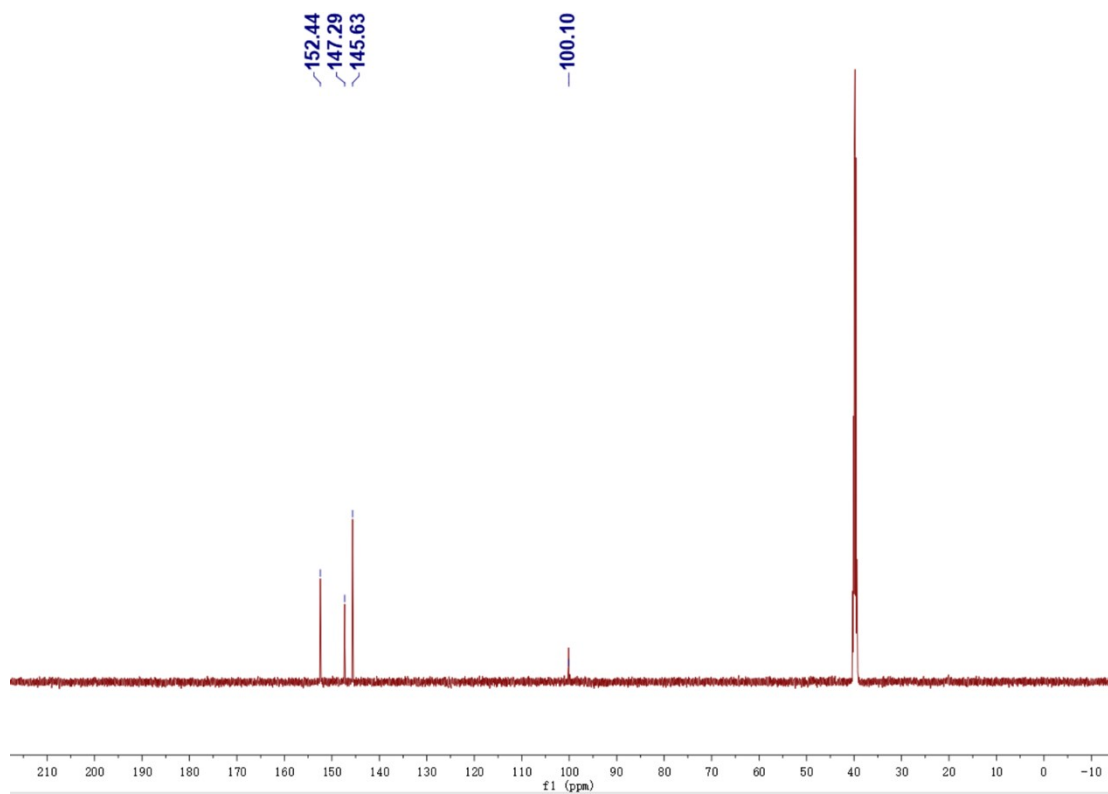

**Figure S4.**  $^{13}\text{C}$  NMR spectra in DMSO-d<sub>6</sub> for **DPT**.

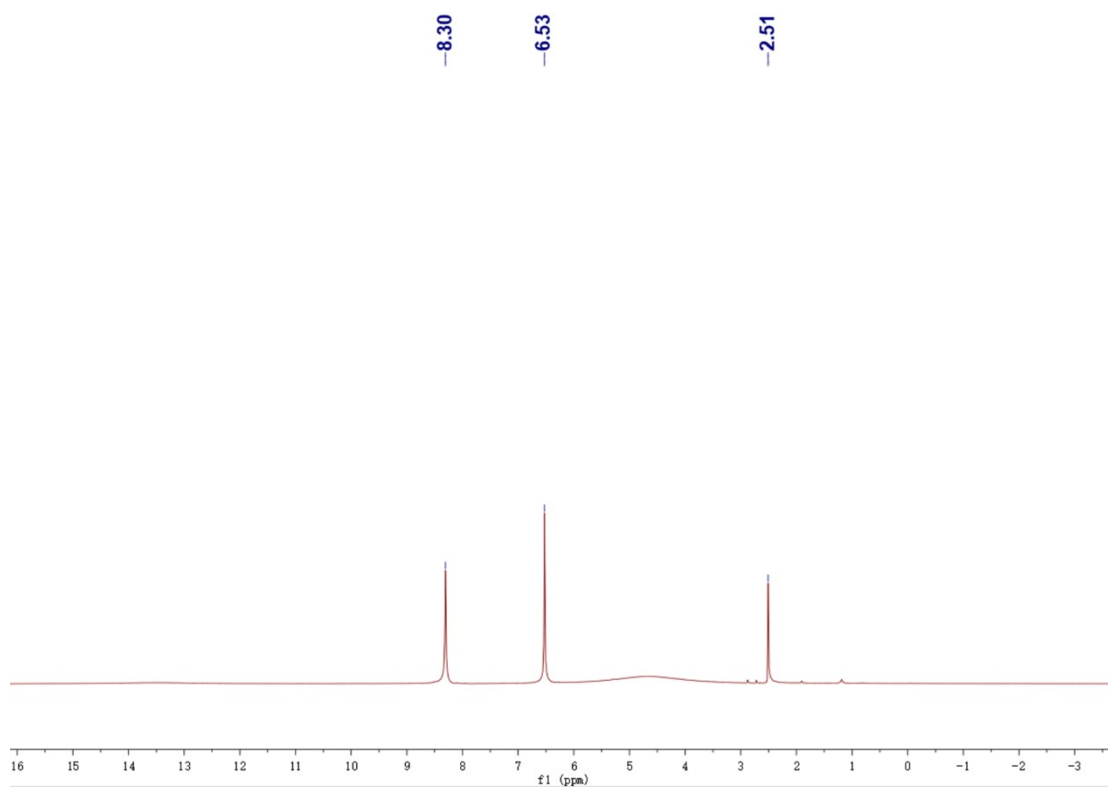

**Figure S5.**  $^1\text{H}$  NMR spectra in DMSO-d<sub>6</sub> for **B2**.

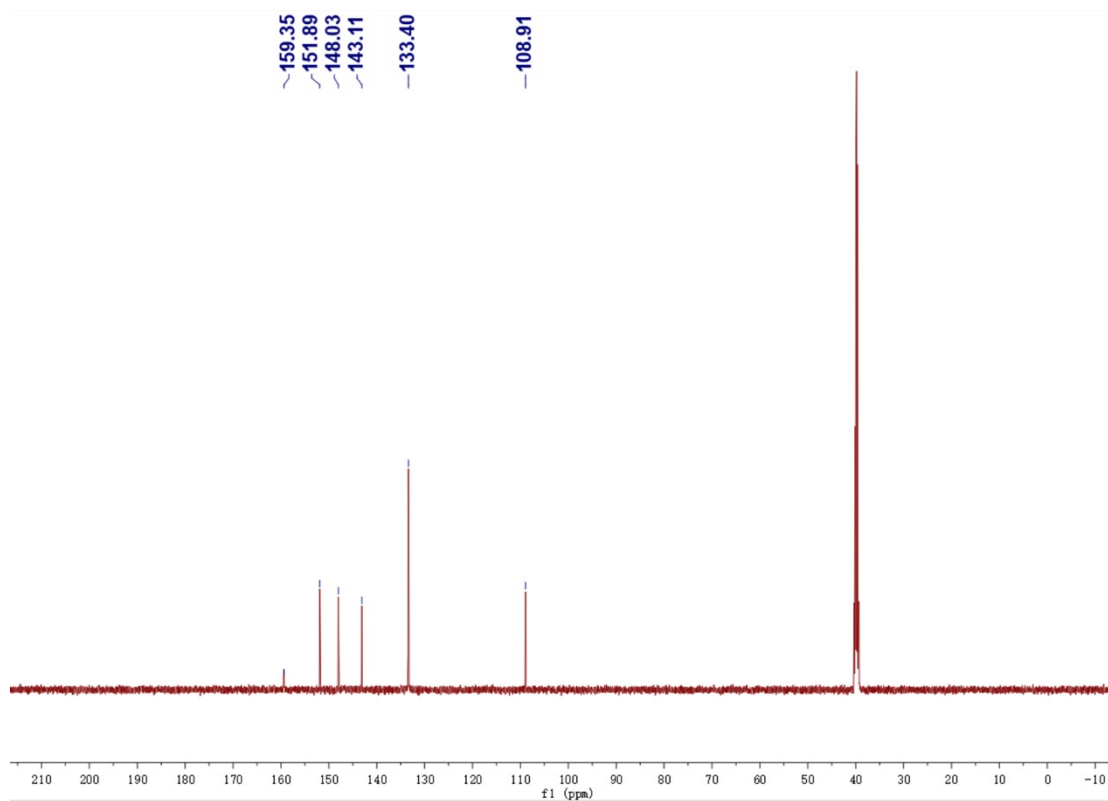

**Figure S6.**  $^{13}\text{C}$  NMR spectra in DMSO-d<sub>6</sub> for **B2**.

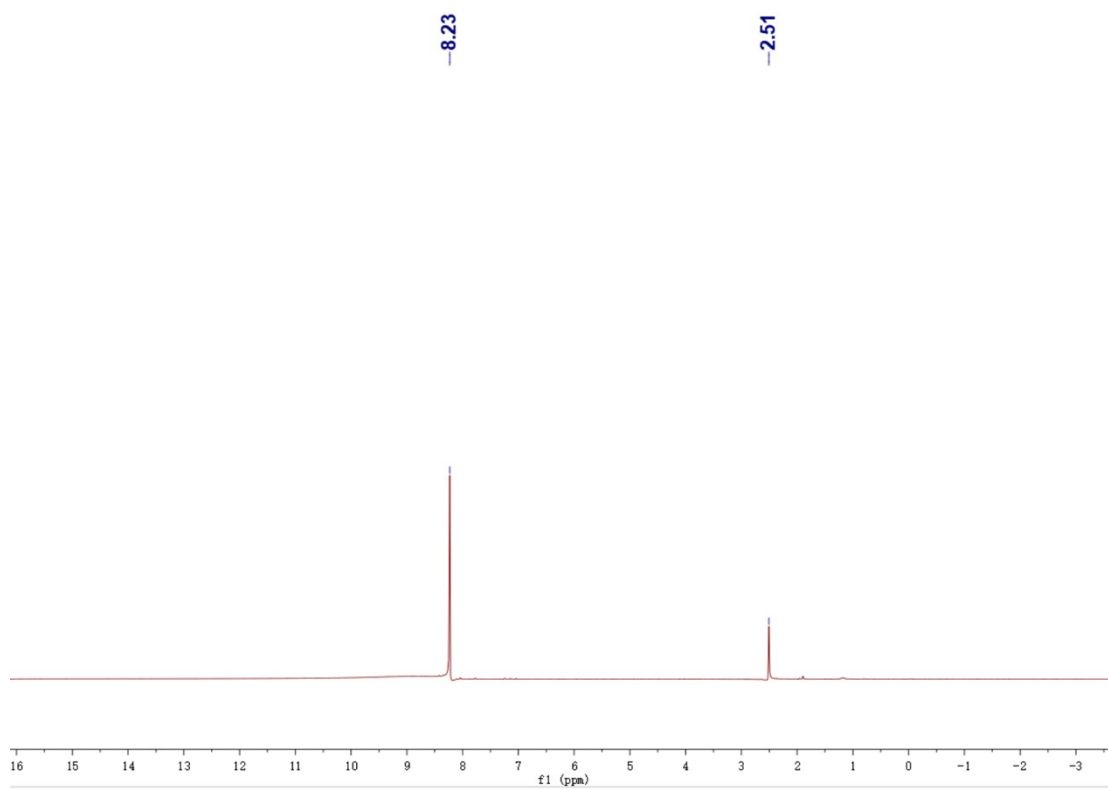

**Figure S7.**  $^1\text{H}$  NMR spectra in DMSO-d<sub>6</sub> for **B3**.



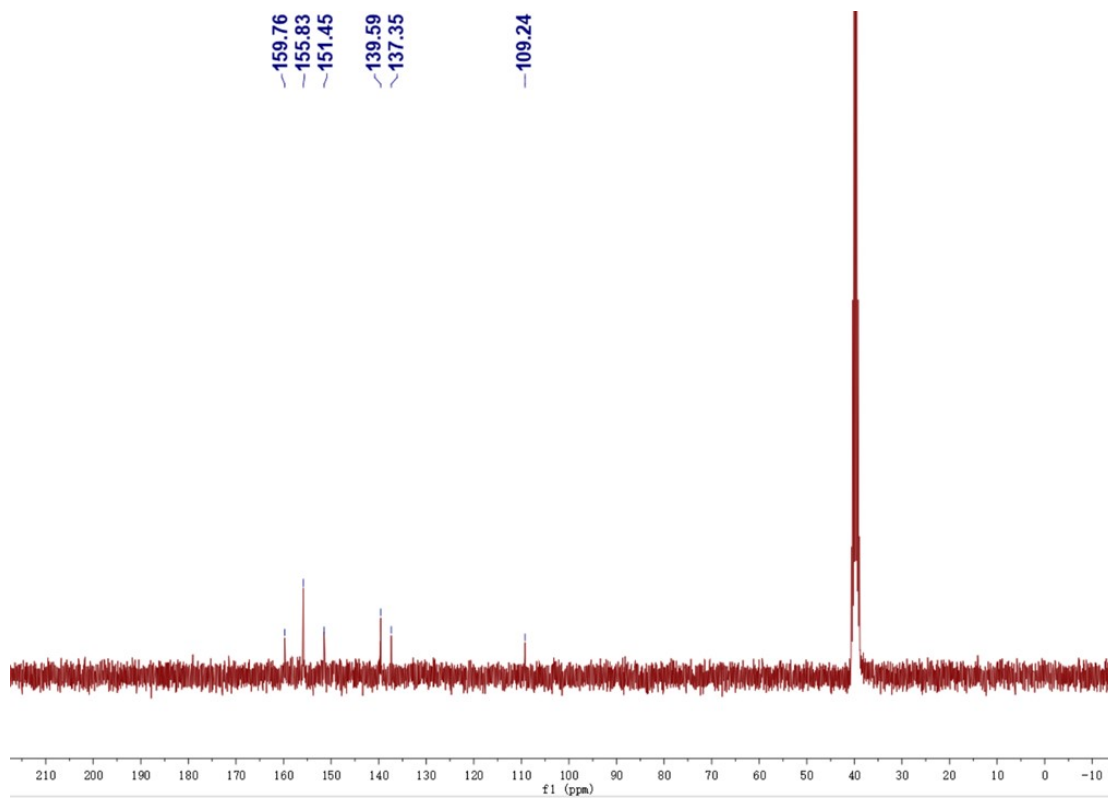

**Figure S8.**  $^{13}\text{C}$  NMR spectra in DMSO-d<sub>6</sub> for **B3**.

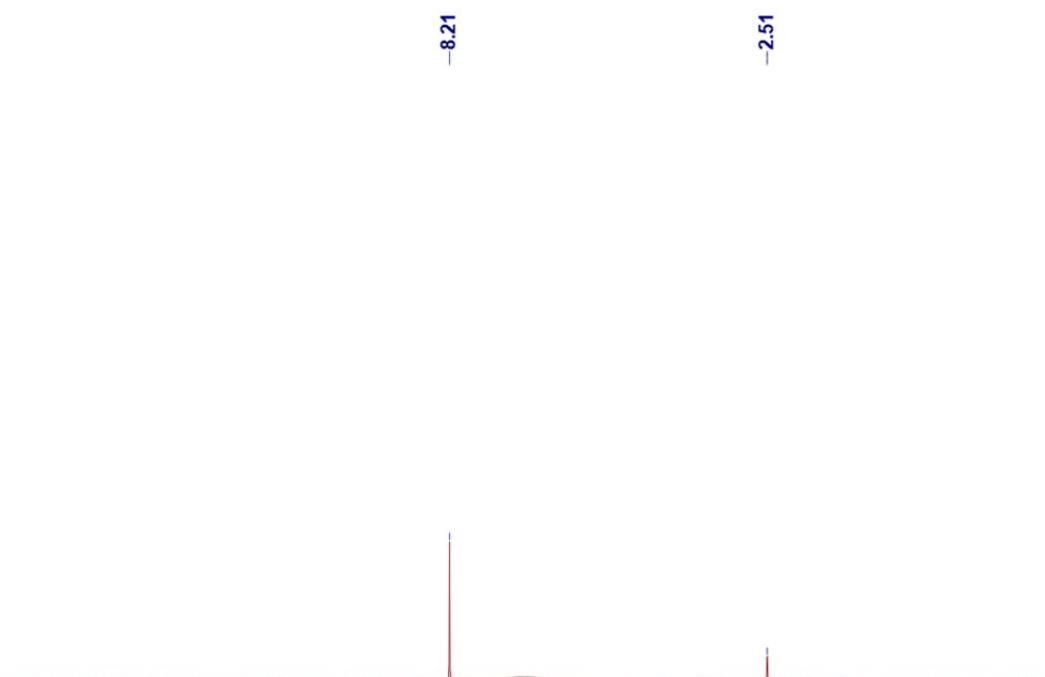

**Figure S9.**  $^1\text{H}$  NMR spectra in DMSO-d<sub>6</sub> for **B4**.

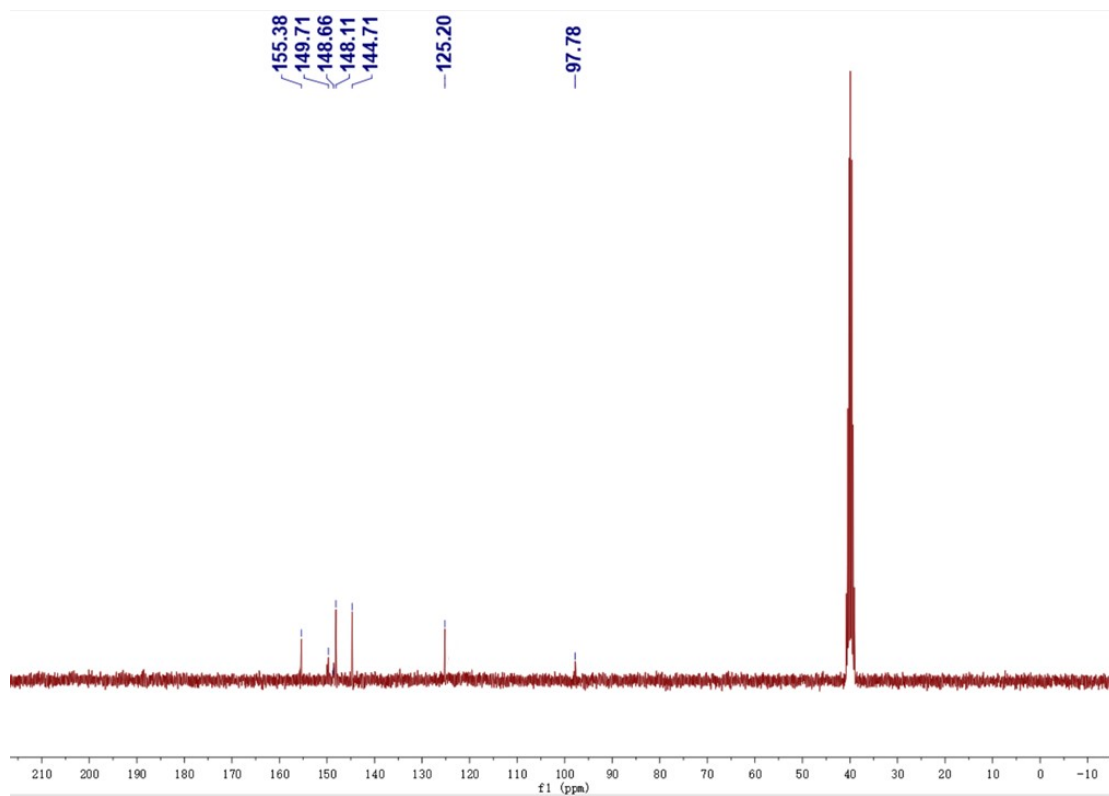

**Figure S10.**  $^{13}\text{C}$  NMR spectra in DMSO- $d_6$  for **B4**.

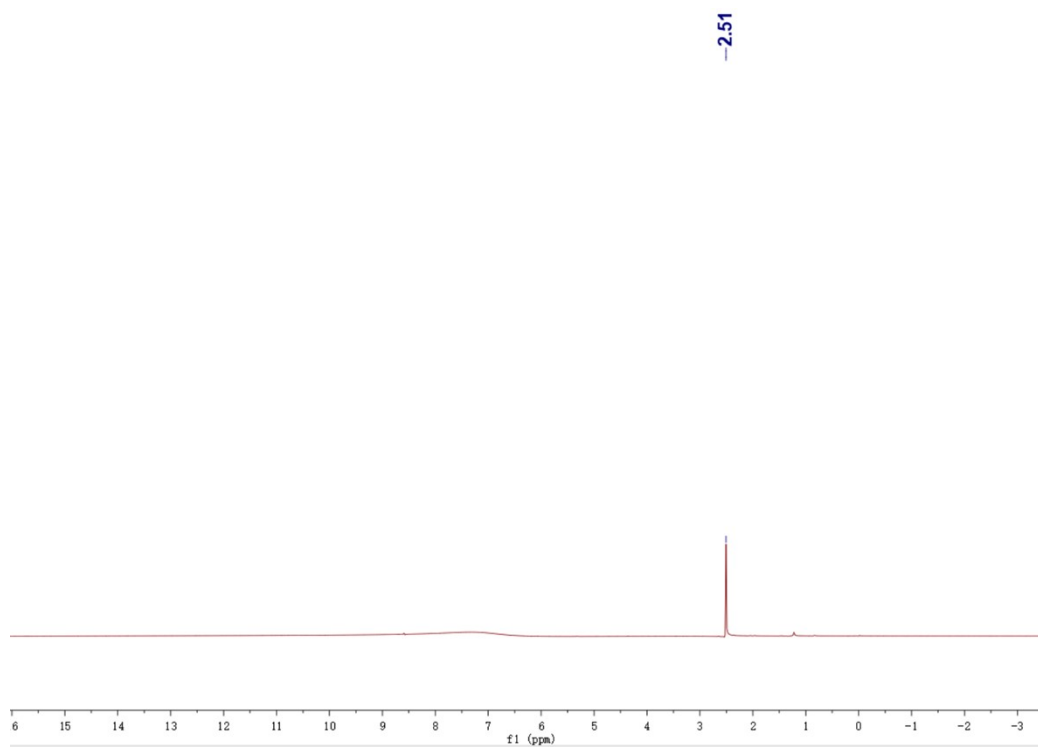

**Figure S11.**  $^1\text{H}$  NMR spectra in DMSO-d6 for DPTO.

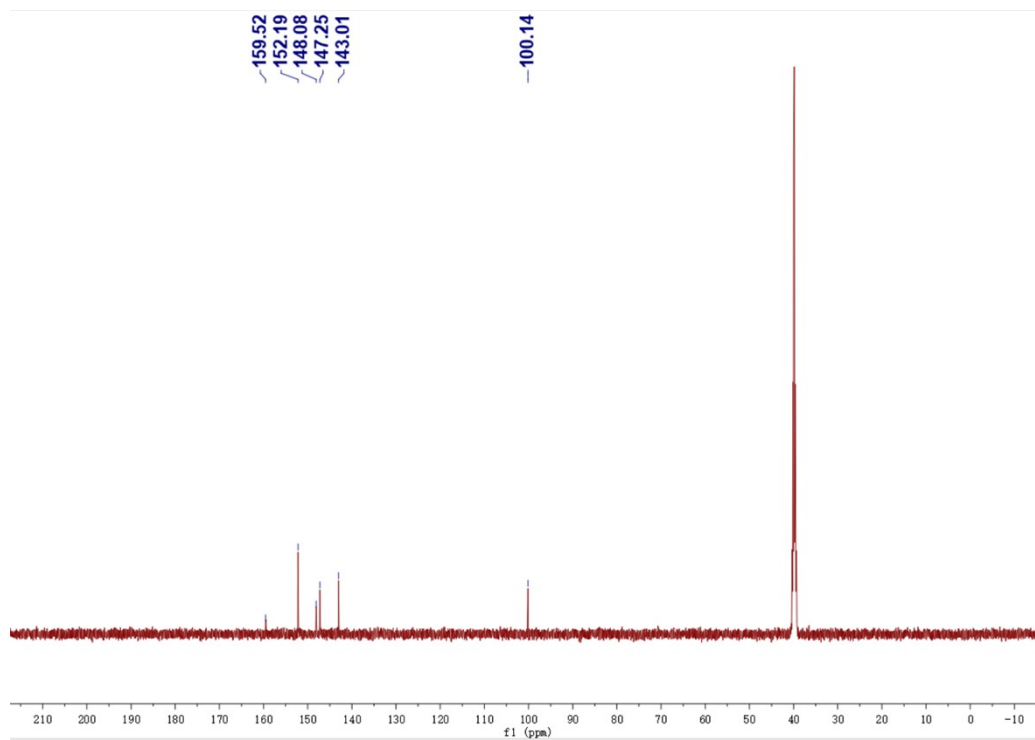

**Figure S12.**  $^1\text{H}$  NMR spectra in DMSO-d6 for DPTO.

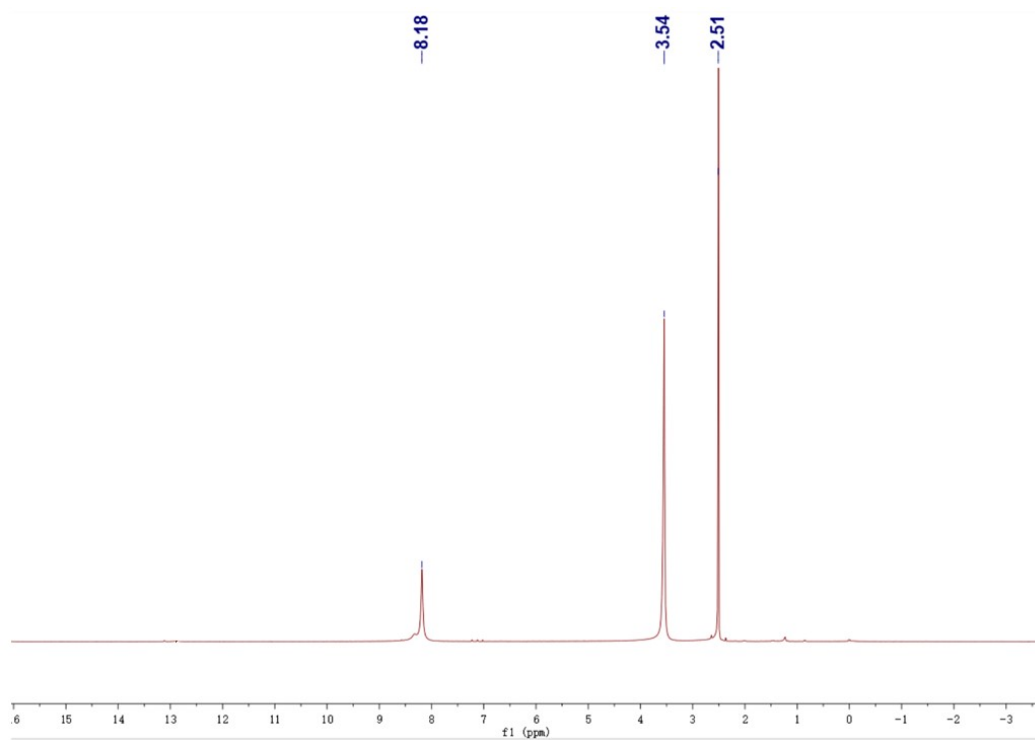

**Figure S13.**  $^1\text{H}$  NMR spectra in DMSO-d<sub>6</sub> for C2.

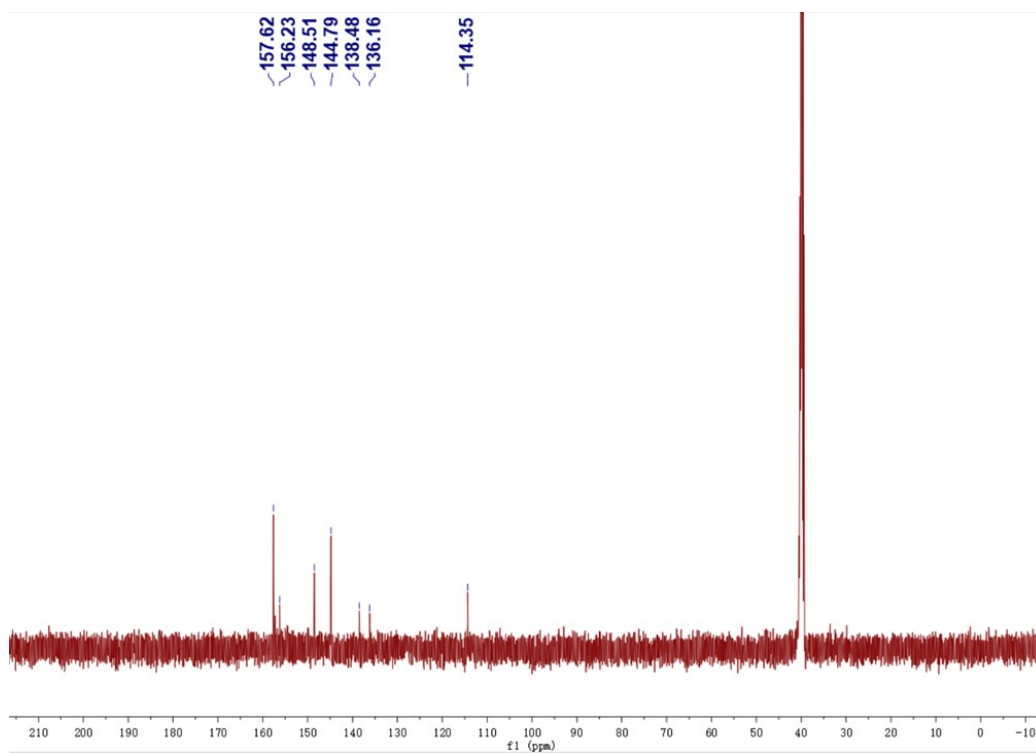

**Figure S14.**  $^1\text{H}$  NMR spectra in DMSO-d<sub>6</sub> for C2.

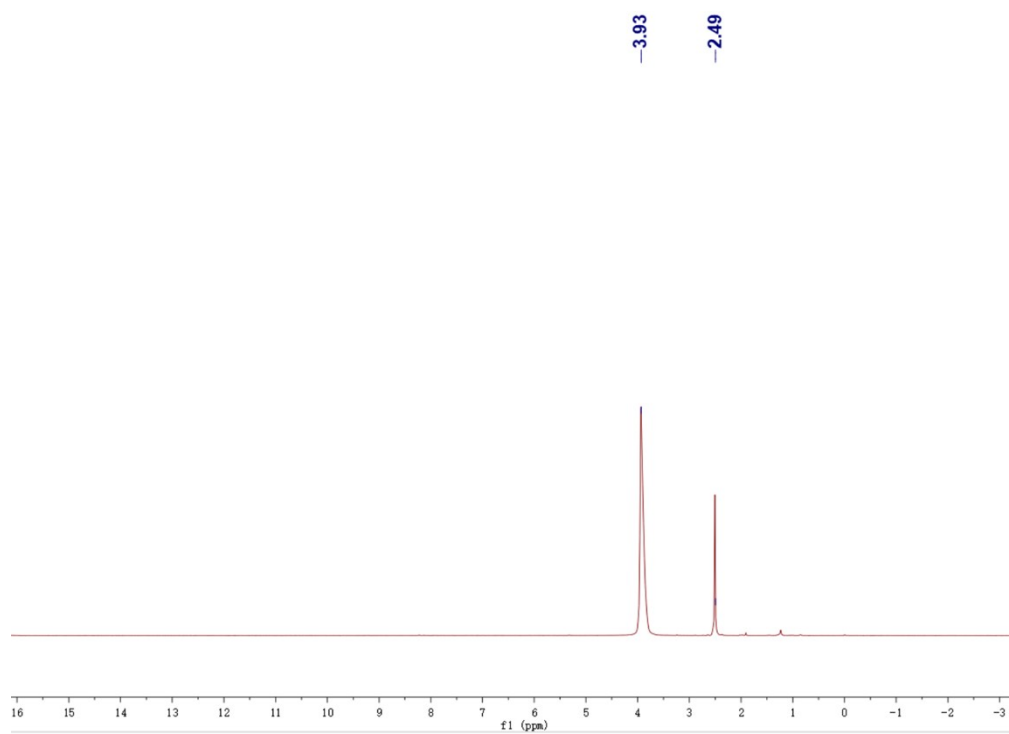

**Figure S15.**  $^1\text{H}$  NMR spectra in DMSO-d6 for DPPT.

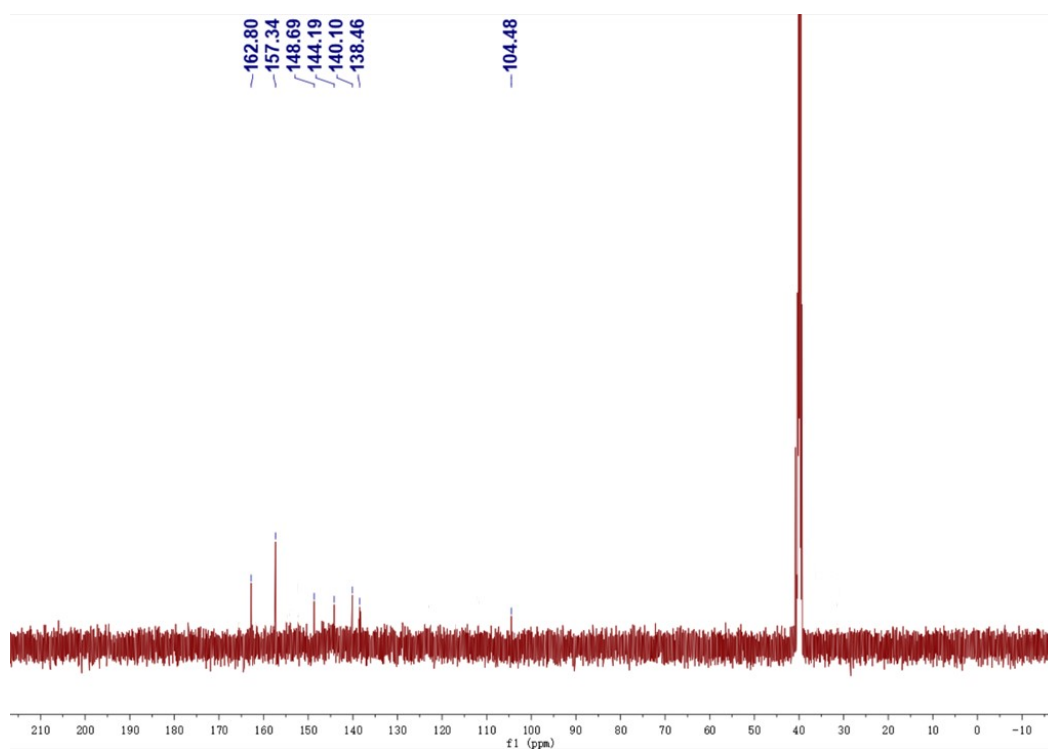

**Figure S16.**  $^1\text{H}$  NMR spectra in DMSO-d6 for DPPT.

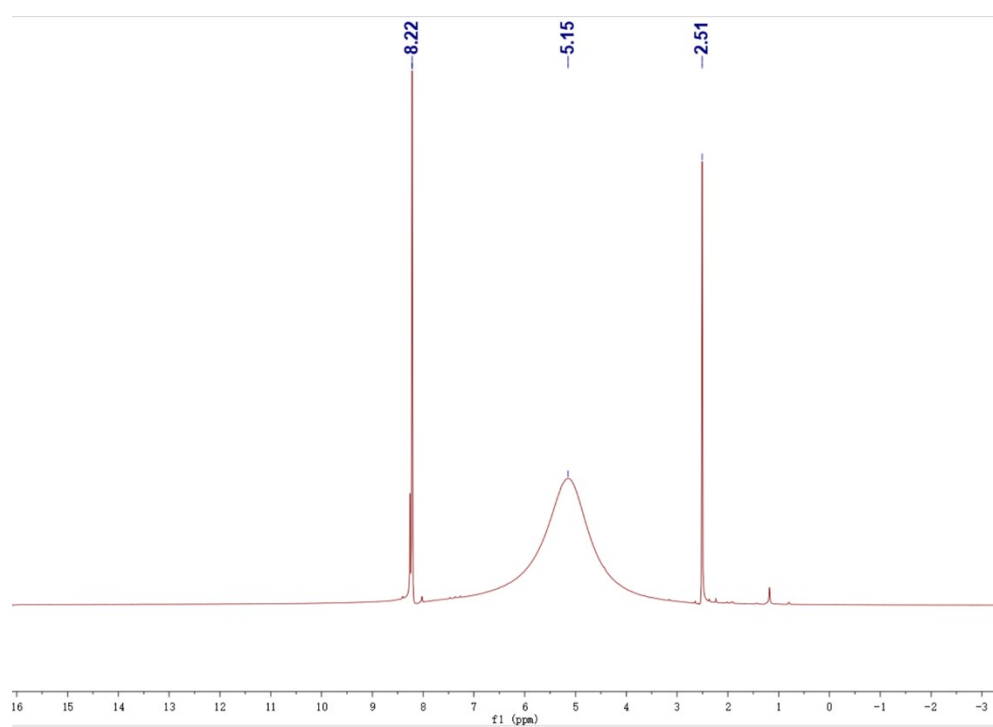

**Figure S17.**  $^1\text{H}$  NMR spectra in DMSO-d<sub>6</sub> for **D2**.

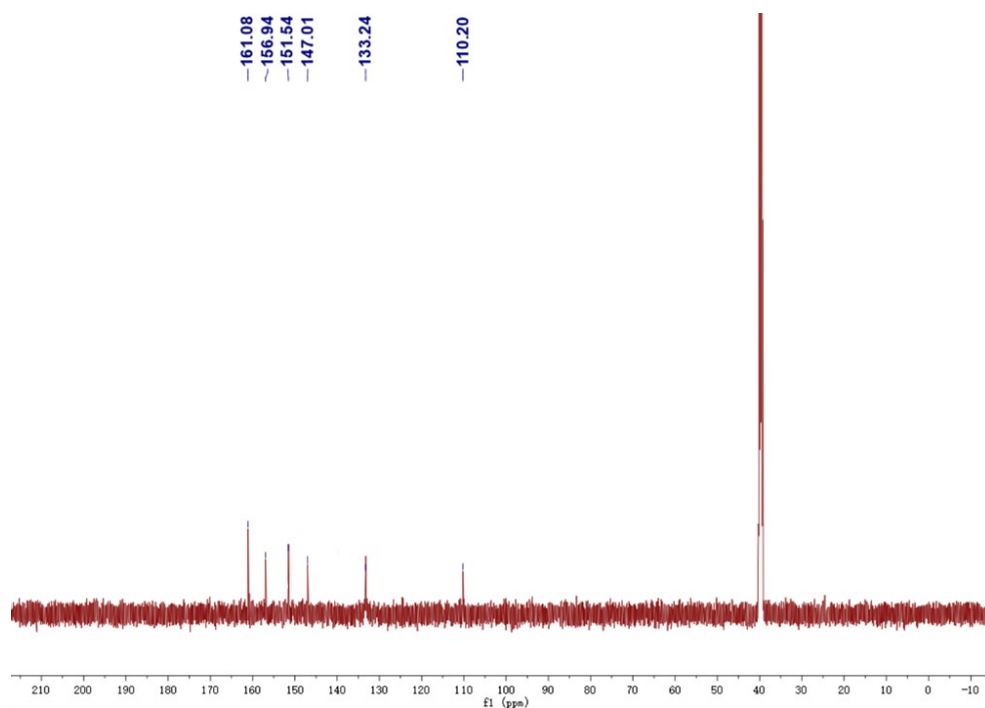

**Figure S18.**  $^{13}\text{C}$  NMR spectra in DMSO-d<sub>6</sub> for **D2**.

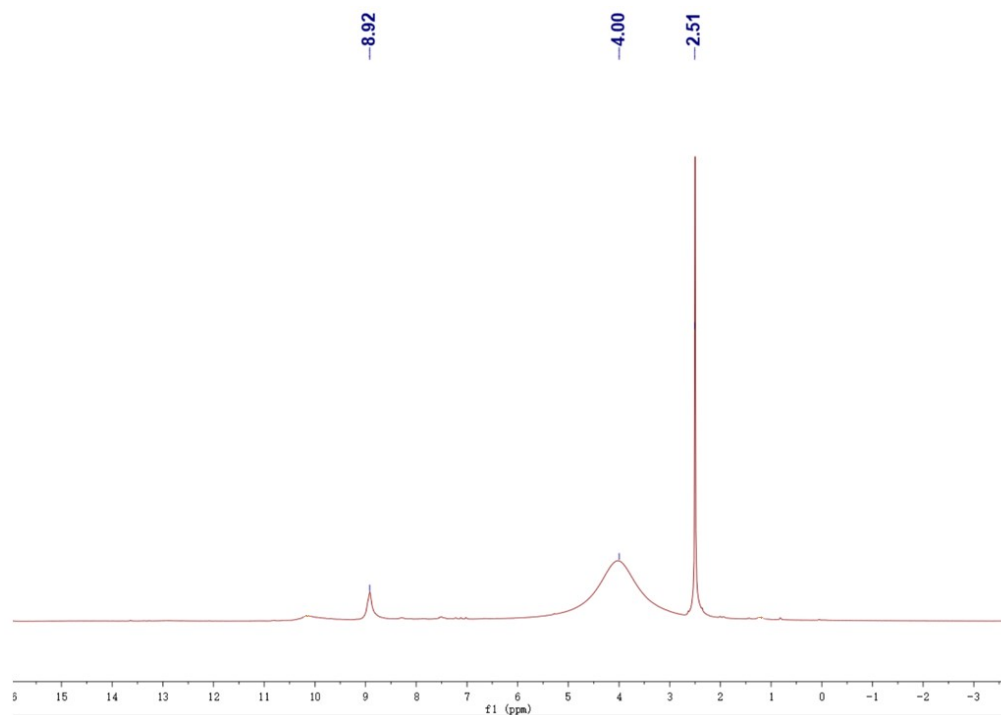

**Figure S19.**  $^1\text{H}$  NMR spectra in DMSO-d<sub>6</sub> for **D3**.

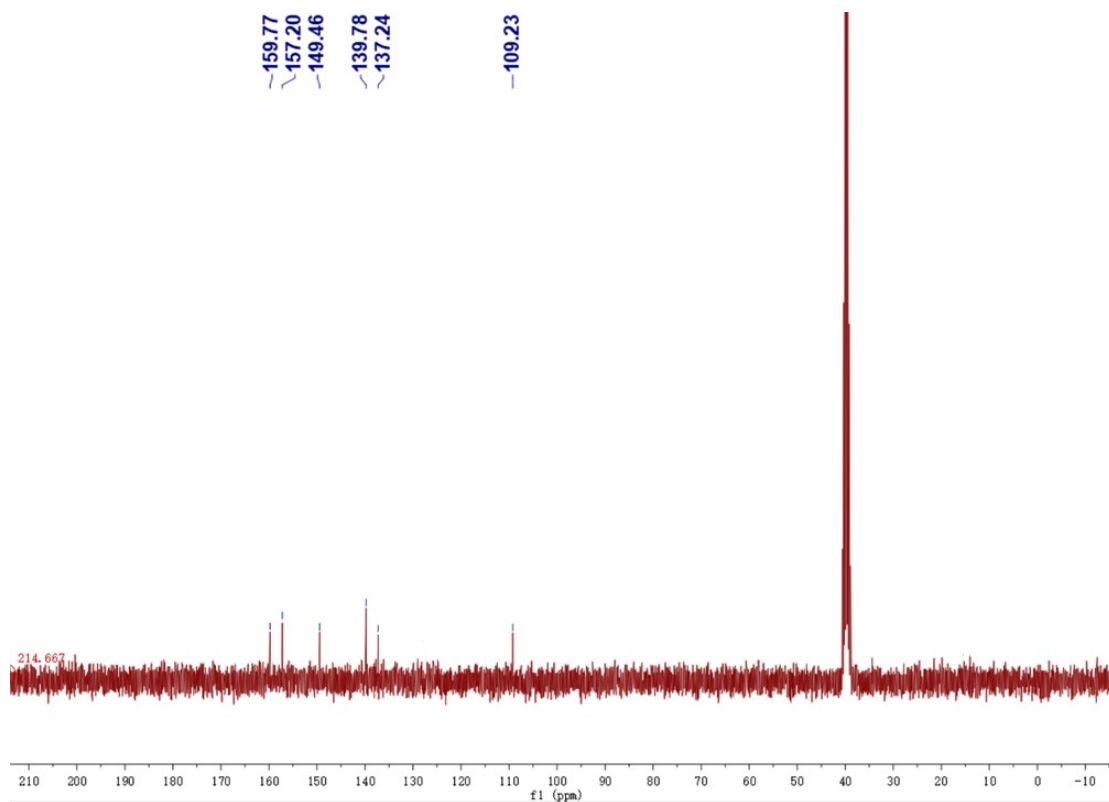

Figure S20.  $^{13}\text{C}$  NMR spectra in DMSO- $d_6$  for D3.

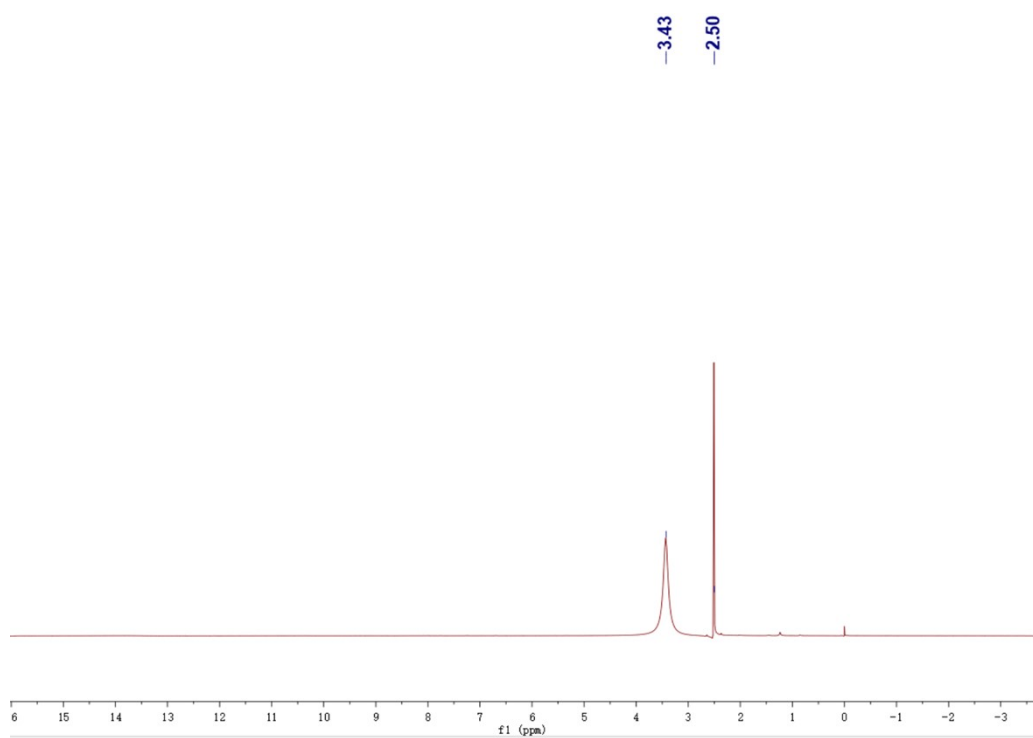

**Figure S21.**  $^1\text{H}$  NMR spectra in DMSO-d<sub>6</sub> for **D4**.

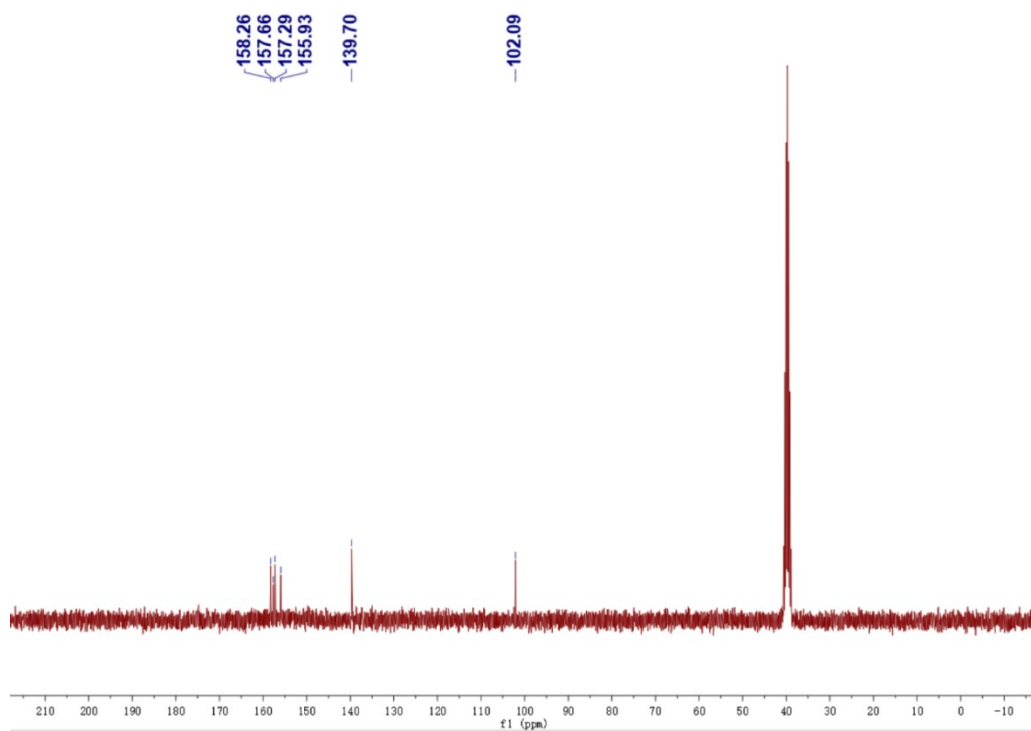

**Figure S22.**  $^{13}\text{C}$  NMR spectra in DMSO-d<sub>6</sub> for **D4**.

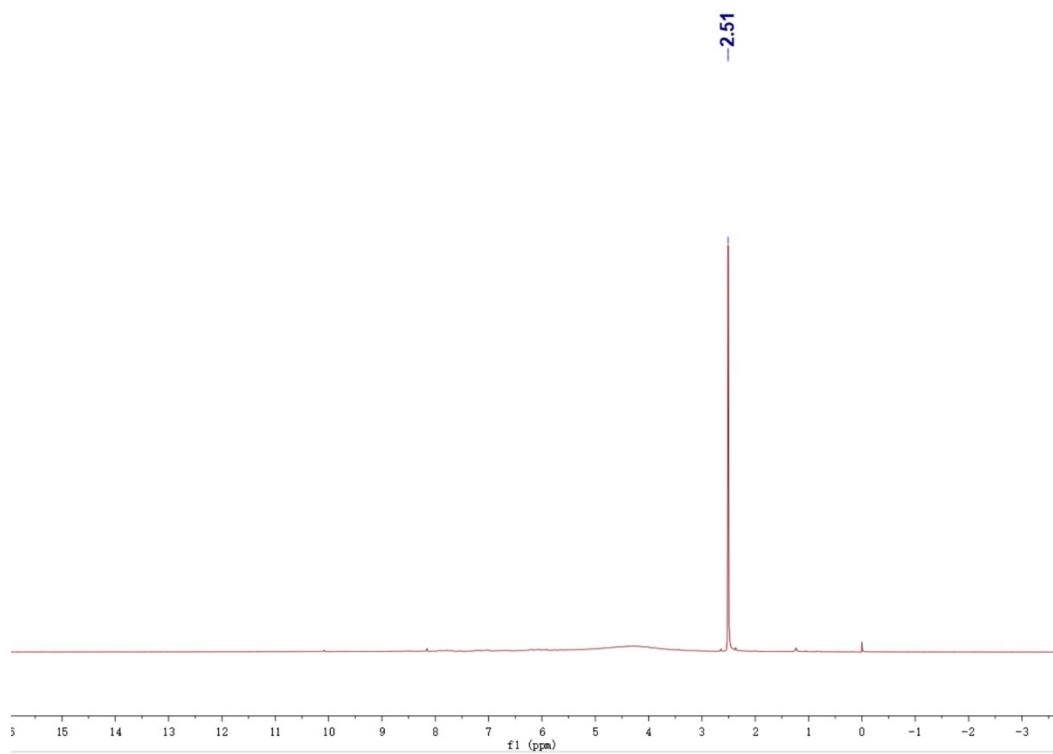



**Figure S23.**  $^1\text{H}$  NMR spectra in DMSO-d6 for DPBT.

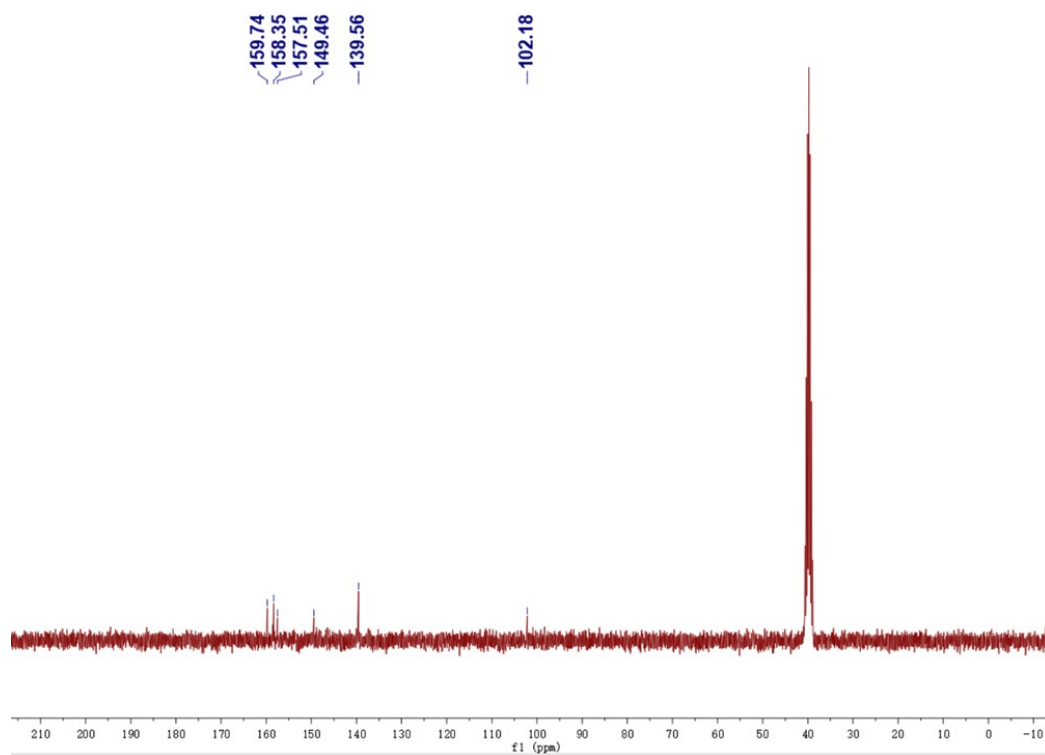

**Figure S24.**  $^1\text{H}$  NMR spectra in DMSO-d6 for DPBT.

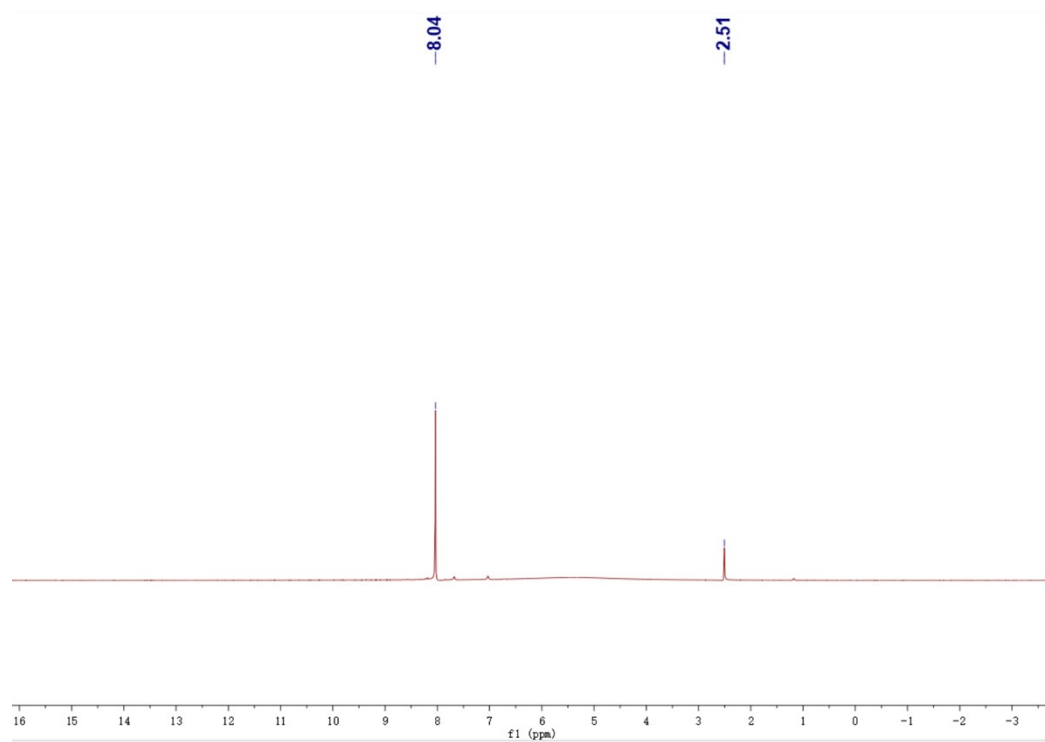

**Figure S25.**  $^1\text{H}$  NMR spectra in DMSO-d<sub>6</sub> for **E3**.

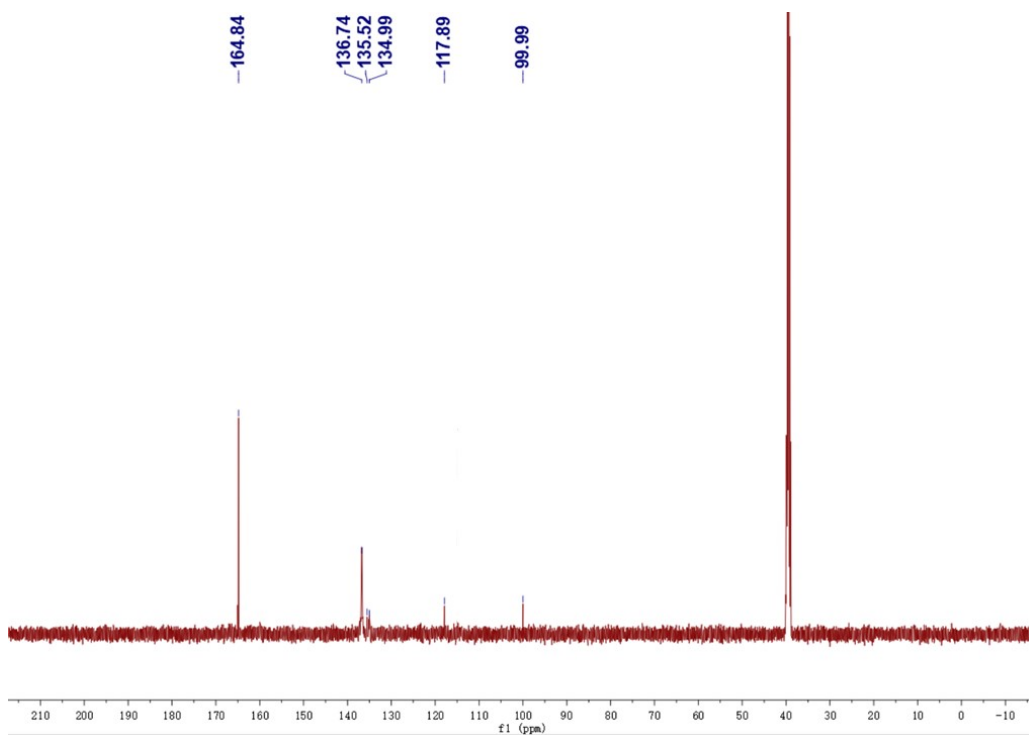

**Figure S26.**  $^{13}\text{C}$  NMR spectra in DMSO-d<sub>6</sub> for **E3**.

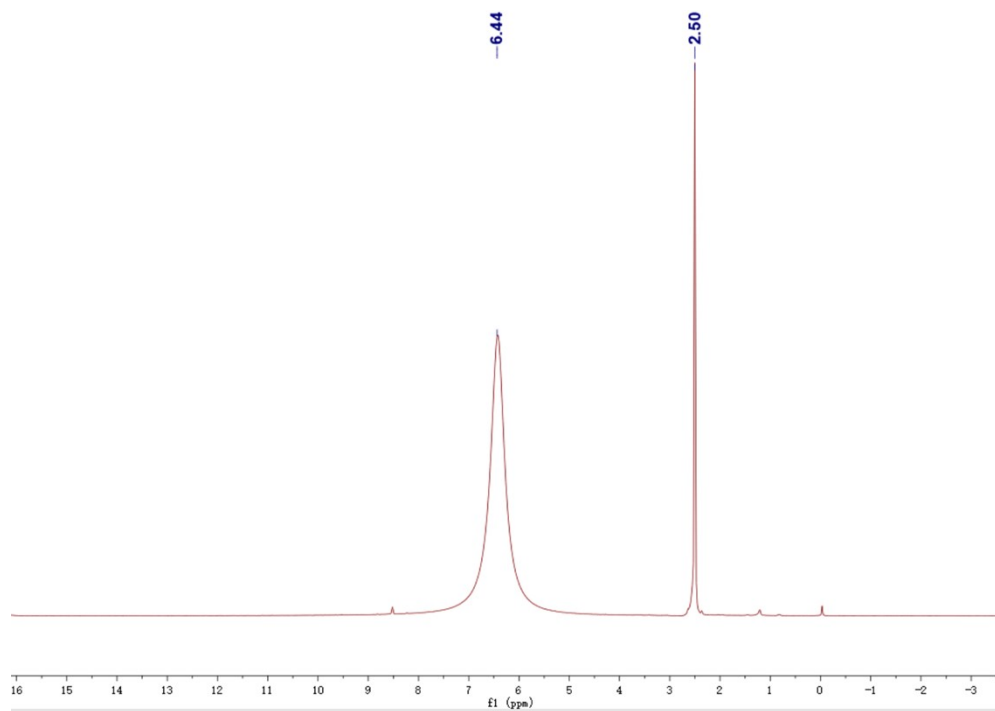

**Figure S27.**  $^1\text{H}$  NMR spectra in DMSO-d<sub>6</sub> for **PBPT**.

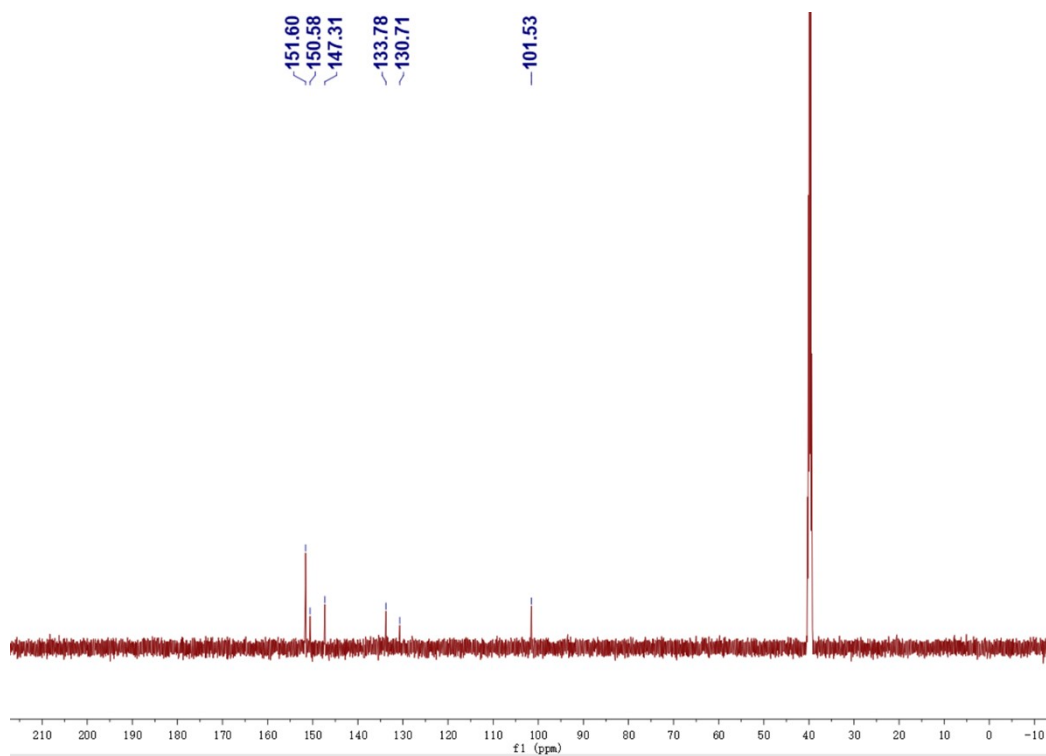

**Figure S28.**  $^{13}\text{C}$  NMR spectra in DMSO- $d_6$  for PBPT.

## 5. DSC and TG of compounds

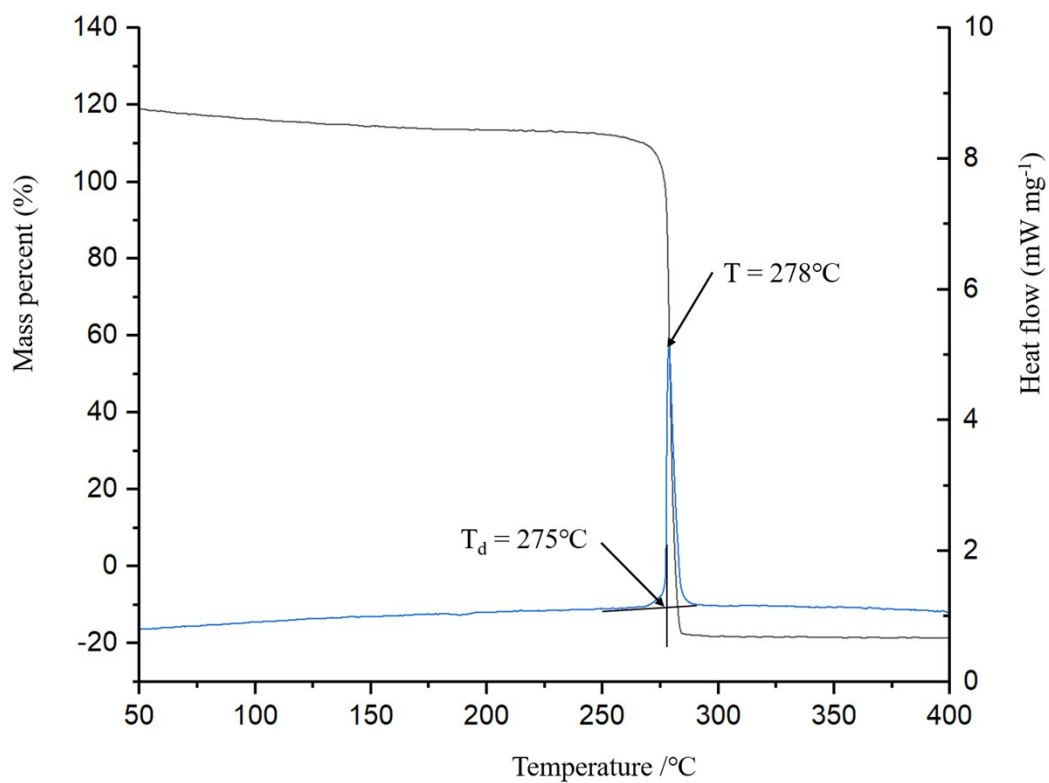

**Figure S29** TG and DSC of **DPT**

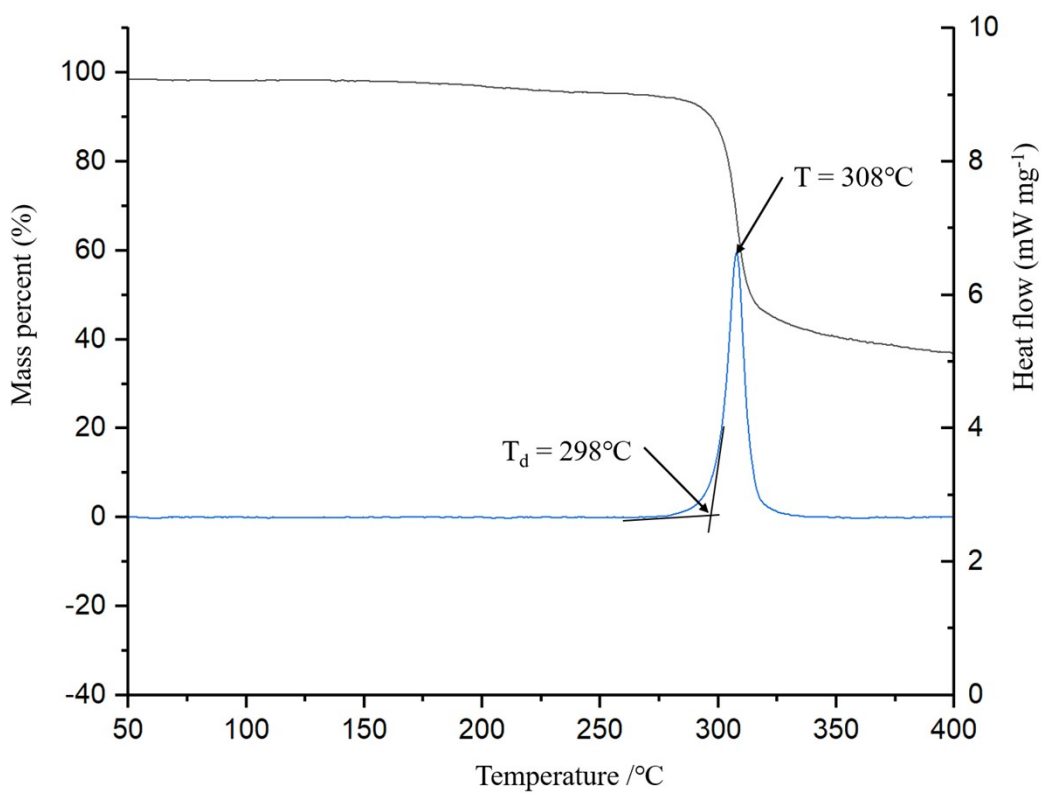

**Figure S30** TG and DSC of **B4**

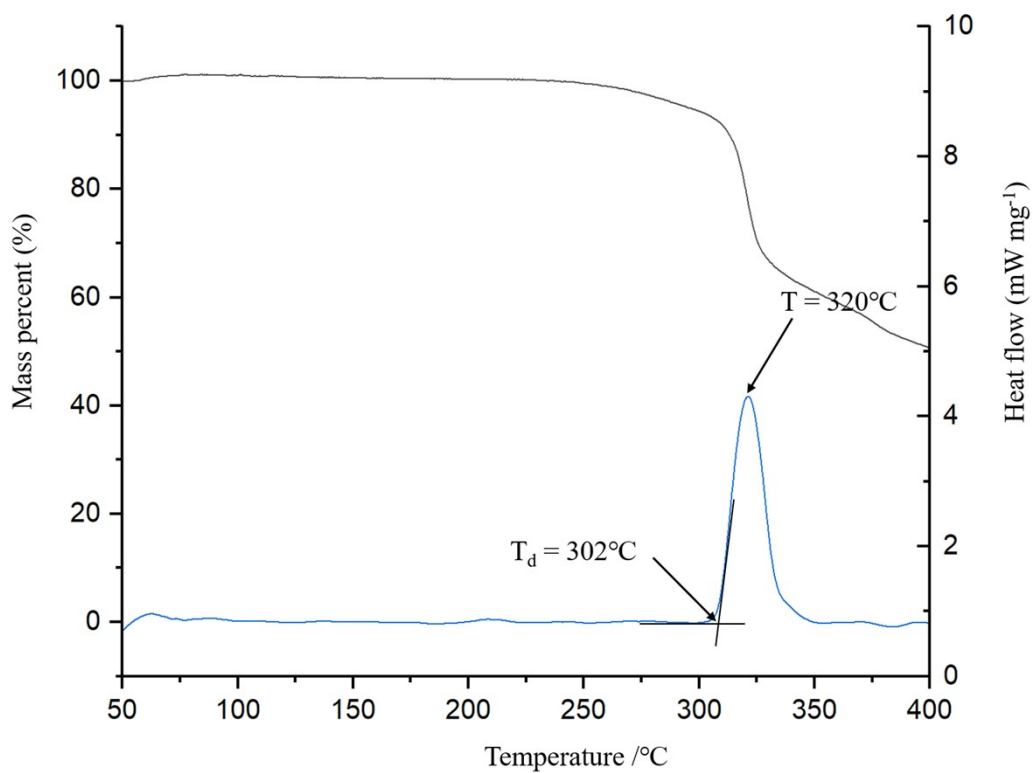

**Figure S31 TG and DSC of DPPTO**

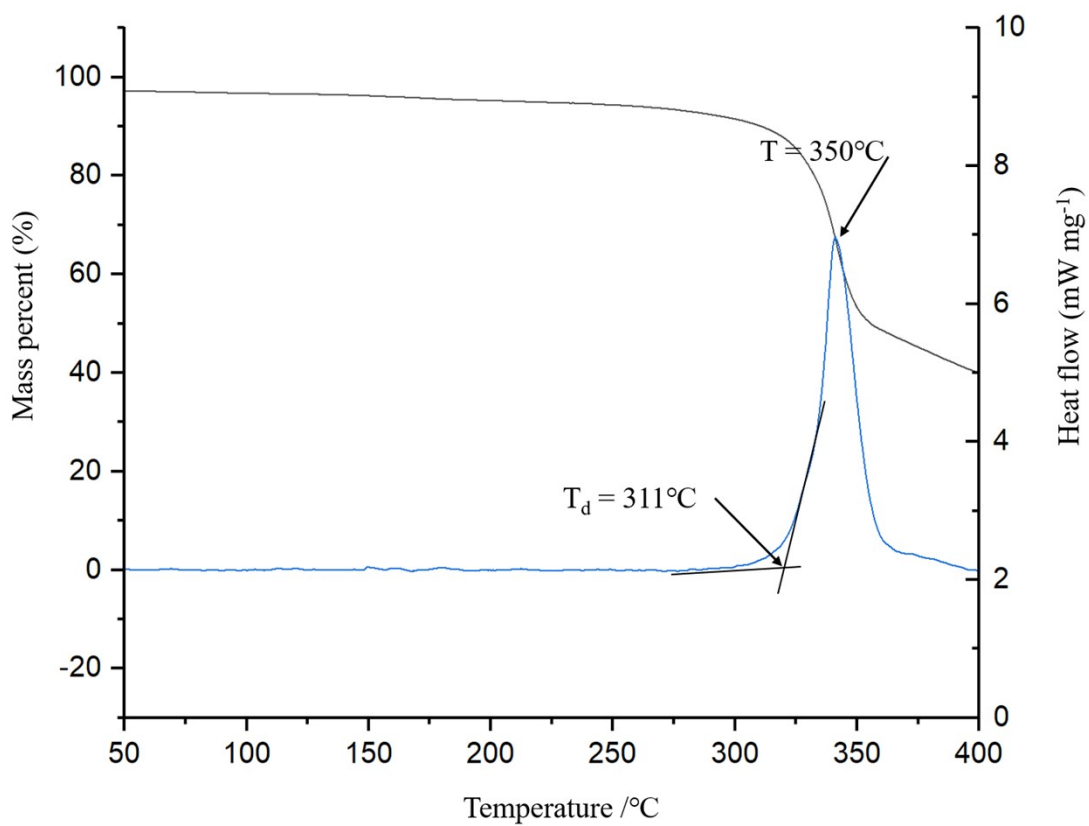

**Figure S32 TG and DSC of DPPT**

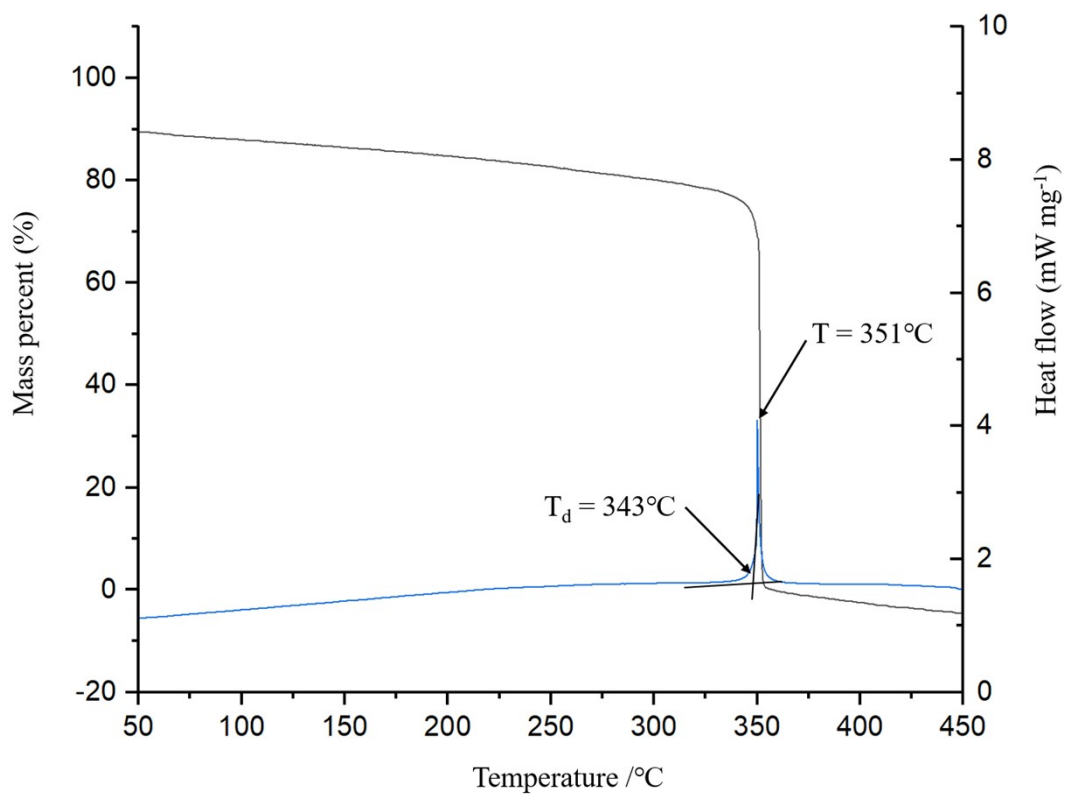

**Figure S33 TG and DSC of D4**

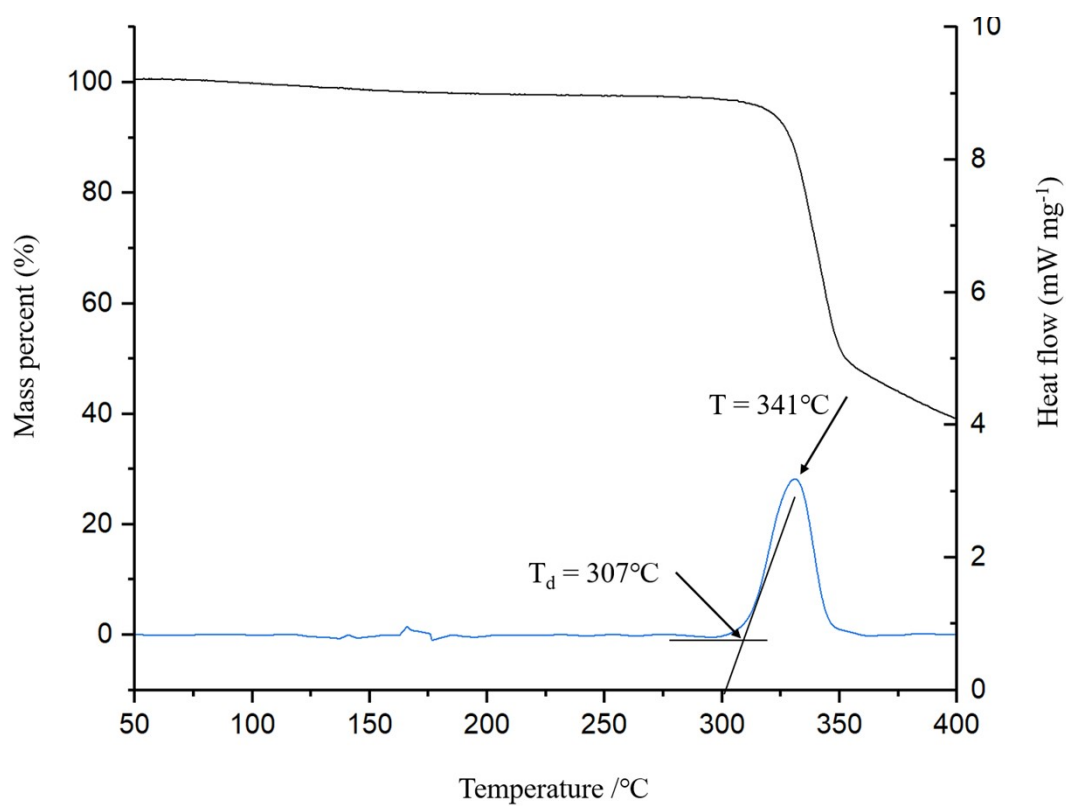

**Figure S34 TG and DSC of DPBT**

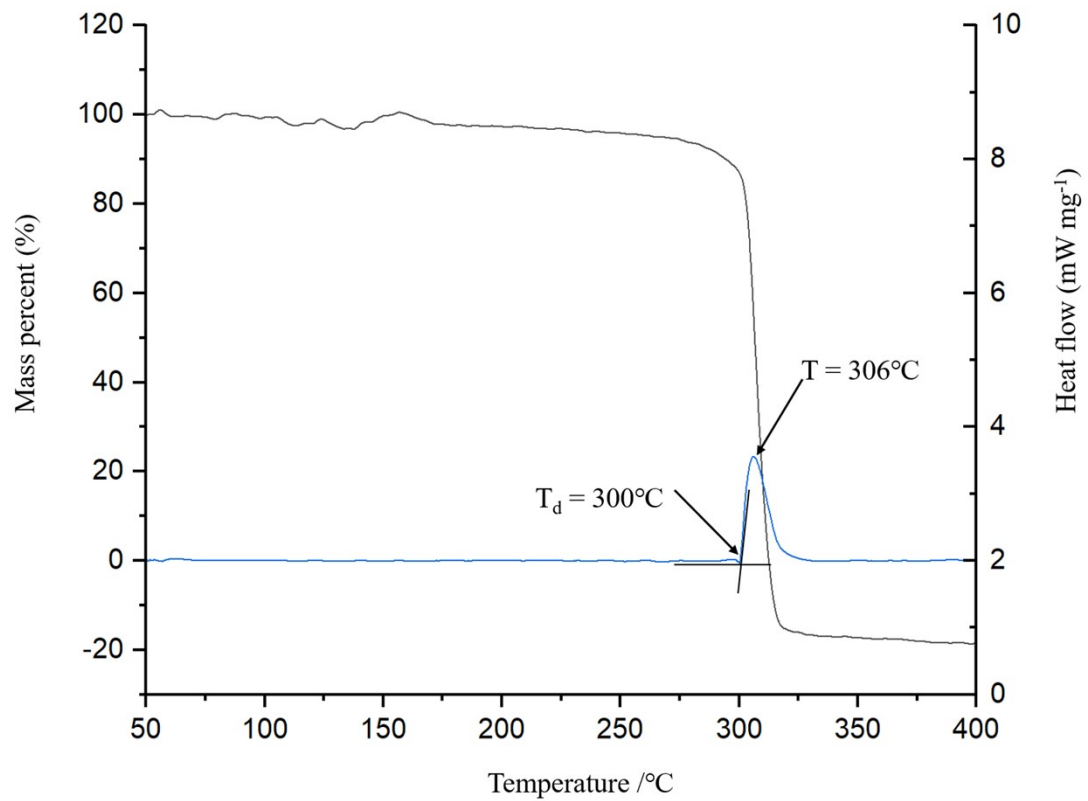

**Figure S35** TG and DSC of PBPT
